# 1 Bidirectional crosstalk between Hypoxia-Inducible 2 Factor and glucocorticoid signalling in zebrafish 3 larvae

4  
5 Davide Marchi<sup>1\*</sup>, Kirankumar Santhakumar<sup>5</sup>, Eleanor Markham<sup>1</sup>, Nan Li<sup>2</sup>, Karl-Heinz  
6 Storbeck<sup>3</sup>, Nils Krone<sup>2,4</sup>, Vincent T. Cunliffe<sup>1</sup> and Fredericus J.M. van Eeden<sup>1\*\*</sup>

7 <sup>1</sup>The Bateson Centre & Department of Biomedical Science, Firth Court, University of Sheffield, Western  
8 Bank, Sheffield, S10 2TN, United Kingdom. <sup>2</sup>The Bateson Centre & Department of Oncology and  
9 Metabolism, School of Medicine, University of Sheffield, Sheffield, S10 2TH, United Kingdom. <sup>3</sup>Department  
10 of Biochemistry, Stellenbosch University, Stellenbosch, 7602, Matieland, South Africa. <sup>4</sup>Department of  
11 Medicine III, University Hospital Carl Gustav Carus, Technische Universität Dresden, Fetscherstrasse 74,  
12 01307 Dresden, Germany. <sup>5</sup>Department of Genetic Engineering, SRM Institute of Science and Technology  
13 Kattankulathur 603 203, India.

14 \*Corresponding author. Tel: +44 1142 24653; E-mail: [dmarchi1@sheffield.ac.uk](mailto:dmarchi1@sheffield.ac.uk)

15 \*\*Corresponding author. Tel: +44 1142 222348; E-mail: [fj.vaneeden@sheffield.ac.uk](mailto:fj.vaneeden@sheffield.ac.uk)

16

## 17 Abstract

18 In the last decades *in vitro* studies highlighted the potential for crosstalk between  
19 Hypoxia-Inducible Factor-(HIF) and glucocorticoid-(GC) signalling pathways.  
20 However, how this interplay precisely occurs *in vivo* is still debated. Here, we use  
21 zebrafish larvae (*Danio rerio*) to elucidate how and to what degree hypoxic  
22 signalling affects the endogenous glucocorticoid pathway and *vice versa, in vivo*.  
23 Firstly, our results demonstrate that in the presence of upregulated HIF  
24 signalling, both glucocorticoid receptor (Gr) responsiveness and endogenous  
25 cortisol levels are repressed in 5 days post fertilisation larvae. In addition,  
26 despite HIF activity being low at normoxia, our data show that it already impedes  
27 both glucocorticoid activity and levels. Secondly, we further analysed the *in vivo*  
28 contribution of glucocorticoids to HIF activity. Interestingly, our results show that  
29 both glucocorticoid receptor (GR) and mineralocorticoid receptor (MR) play a key  
30 role in enhancing it. Finally, we found indications that glucocorticoids promote  
31 HIF signalling via multiple routes. Cumulatively, our findings allowed us to  
32 suggest a model for how this crosstalk occurs *in vivo*.

33

34 **Keywords:** glucocorticoid signalling/hypoxia inducible factor/vhl/zebrafish/  
35 hypothalamus-pituitary-interrenal axis.

1

2 **Subject Categories** Developmental biology; Endocrinology; Metabolism.

### 3 **Author summary**

4 Hypoxia is a common pathophysiological condition to which cells must rapidly respond  
5 in order to prevent metabolic shutdown and subsequent death. This is achieved via the  
6 activity of Hypoxia-Inducible Factors (HIFs), which are key oxygen sensors that mediate  
7 the ability of the cell to cope with decreased oxygen levels.

8 Although it aims to restore tissue oxygenation and perfusion, it can sometimes be  
9 maladaptive and contributes to a variety of pathological conditions including  
10 inflammation, tissue ischemia, stroke and growth of solid tumours. In this regard,  
11 synthetic glucocorticoids which are analogous to naturally occurring steroid hormones,  
12 have been used for decades as anti-inflammatory drugs for treating pathological  
13 conditions which are linked to hypoxia (i.e. asthma, rheumatoid arthritis, ischemic  
14 injury). Indeed, previous *in vitro* studies highlighted the presence of a crosstalk between  
15 HIF and glucocorticoids. However, how this interplay precisely occurs in an organism  
16 and what the molecular mechanism is behind it are questions that still remain  
17 unanswered. Here, we provide a thorough *in vivo* genetic analysis, which allowed us to  
18 propose a logical model of interaction between glucocorticoid and HIF signalling. In  
19 addition, our results are important because they suggest a new route to downregulate  
20 HIF for clinical purposes.

21

### 22 **Introduction**

23 Glucocorticoids (GC) constitute a well-characterized class of lipophilic steroid  
24 hormones produced by the adrenal glands in humans and by the interrenal tissue in  
25 teleosts. The circadian production of glucocorticoids in teleosts is regulated by the  
26 hypothalamus-pituitary-interrenal (HPI) axis, which is the equivalent of the mammalian  
27 hypothalamus-pituitary-adrenal (HPA) axis. Both are central to stress adaptation (Alsop  
28 and Vijayan, 2009; Griffiths *et al.*, 2012; Tokarz *et al.*, 2013; Faught and Vijayan, 2018).  
29 Interestingly, both in humans and teleosts cortisol is the primary glucocorticoid and  
30 regulates a plethora of physiological processes including glucose homeostasis,  
31 inflammation, intermediary metabolism and stress response (Facchinello *et al.*, 2017).  
32 In particular, cortisol can exert these functions via direct binding both to the

1 glucocorticoid receptor (Gr) and to the mineralocorticoid receptor (Mr), which bind  
2 cortisol with different affinities. (Bamberger, Schulte and Chrousos, 1996; Faught and  
3 Vijayan, 2018). Together they act as a transcription factor, which can function either in  
4 a genomic or in non-genomic way (Stahn and Buttgereit, 2008; Mitre-Aguilar, *et al.*,  
5 2015; Facchinello *et al.*, 2017; Panettieri *et al.*, 2019).

6 Hypoxia-inducible factor (HIF) transcription factors are key regulators of the  
7 cellular response to hypoxia, which coordinate a metabolic shift from aerobic to  
8 anaerobic metabolism in the presence of low oxygen availability in order to assure  
9 homeostasis (Semenza, 2011). In mammals there are at least three isoforms of HIF- $\alpha$   
10 (HIF-1 $\alpha$ , HIF-2 $\alpha$  and HIF-3 $\alpha$ ) and two main isoforms of HIF-1 $\beta$  (ARNT1 and ARNT2).  
11 (Dougherty and Pollenz, 2010). Interestingly, due to a genome duplication event, there  
12 are two paralogs for each of the three Hif- $\alpha$  isoforms (Hif-1 $\alpha$ a, Hif-1 $\alpha$ b, Hif-2 $\alpha$ a, Hif-2 $\alpha$ b,  
13 Hif-3 $\alpha$ a and Hif-3 $\alpha$ b) in zebrafish. Among these, Hif-1 $\alpha$ b is thought to be the key  
14 zebrafish homologue in the hypoxic response (Elks *et al.*, 2015). With respect to *HIF-1 $\beta$*   
15 (*ARNT*) paralogs, the expression of two genes encoding Arnt1 and Arnt2 proteins has  
16 been described in zebrafish (Wang *et al.*, 2000; Prasch *et al.*, 2006; Hill *et al.*, 2009;  
17 Pelster and Egg, 2018).

18 Whilst ARNT is constitutively expressed in the nucleus, the cytoplasmic HIF- $\alpha$   
19 subunits are primarily regulated post-translationally via the PHD3-VHL-E3-ubiquitin  
20 ligase protein degradation complex. This is believed to occur in order to allow a rapid  
21 response to decreasing oxygen levels (Berra *et al.*, 2001; Moroz *et al.*, 2009; Köblitz *et*  
22 *al.*, 2015; Elks *et al.*, 2015). Indeed, hypoxia, is a common pathophysiological condition  
23 (Bertout, Patel and Simon, 2008; Semenza, 2013) to which cells must promptly respond  
24 in order to avert metabolic shutdown and subsequent death (Elks *et al.*, 2015). In the  
25 presence of normal oxygen levels, a set of prolyl hydroxylases (PHD1, 2 and 3) use the  
26 available molecular oxygen directly to hydroxylate HIF- $\alpha$  subunit. Hydroxylated HIF- $\alpha$   
27 is then recognised by the Von Hippel Lindau (VHL) protein, which acts as the substrate  
28 recognition part of a E3-ubiquitin ligase complex. This leads to HIF- $\alpha$  proteasomal  
29 degradation to avoid HIF pathway activation under normoxic conditions. On the other  
30 hand, low O<sub>2</sub> levels impair the activity of the PHD enzymes leading to HIF- $\alpha$  stabilisation  
31 and subsequent translocation in the nucleus. Here, together with the HIF- $\beta$  subunit, HIF-  
32  $\alpha$  forms a functional transcription complex, which drives the hypoxic response  
33 (Semenza, 2012). Although the HIF response is aimed to restore tissue oxygenation and  
34 perfusion, it can sometimes be maladaptive and can contribute to a variety of

1 pathological conditions including inflammation, tissue ischemia, stroke and growth of  
2 solid tumours (Cummins and Taylor, 2005). Finally, it is important to note for this study  
3 that HIF signalling is able to regulate its own activation via negative feedback, by  
4 inducing the expression of PHD genes, in particular prolyl hydroxylase 3 (PHD3)  
5 (Pescador *et al.*, 2005; Santhakumar *et al.*, 2012).

6 The presence of a crosstalk between glucocorticoids and hypoxia dependent  
7 signalling pathways has been reported in several *in vitro* studies (Kodama *et al.*, 2003;  
8 Leonard *et al.*, 2005; Wagner *et al.*, 2008; Zhang *et al.*, 2015, 2016). Moreover, synthetic  
9 glucocorticoids (ie. betamethasone and dexamethasone), which are analogous to  
10 naturally occurring steroid hormones, have been extensively used for decades as anti-  
11 inflammatory drugs for treating pathological conditions which are linked to hypoxia (i.e.  
12 asthma, rheumatoid arthritis, ischemic injury, etc.) (Nikolaus, Fölsch and Schreiber,  
13 2000; Neeck, Renkawitz and Eggert, 2002; Busillo and Cidlowski, 2013). However, due  
14 to the presence of adverse effects (Moghadam-Kia and Werth, 2010) and glucocorticoid  
15 resistance (Barnes and Adcock, 2009; Barnes, 2011), their use has been limited.  
16 Therefore, extending the research on how precisely this interplay occurs *in vivo*, may  
17 have a wide physiological significance in health and disease.

18 The first evidence of interaction between HIF and GR was provided by Kodama  
19 *et al.* 2003, who discovered that ligand-dependent activation of glucocorticoid receptor  
20 enhances hypoxia-dependent gene expression and hypoxia response element (HRE)  
21 activity in HeLa cells. Leonard *et al.* 2005 subsequently revealed that GR is  
22 transcriptionally upregulated by hypoxia in human renal proximal tubular epithelial  
23 cells. Furthermore, the hypoxic upregulation of GR was confirmed by Zhang *et al.* 2015.  
24 In contrast, a dexamethasone-mediated inhibition of HIF-1 $\alpha$  target genes expression in  
25 hypoxic HEPG2 cells was demonstrated by Wagner *et al.* 2008. In addition to that, they  
26 showed retention of HIF-1 $\alpha$  in the cytoplasm, suggesting a blockage in nuclear import.  
27 Finally, Gaber *et al.*, 2011 indicated the presence of dexamethasone-induced  
28 suppression of HIF-1 $\alpha$  protein expression, which resulted in reduced HIF-1 target gene  
29 expression.

30 From these *in vitro* results it has become clear that the HIF-GC crosstalk is  
31 complex and may depend on cell type. In the present study, we have used the zebrafish  
32 (*Danio rerio*) as an *in vivo* model organism to study how and to what degree hypoxic  
33 signalling affects the endogenous glucocorticoids' response and vice versa. The use of  
34 whole animals allows us to show how these signals interact at a more global level than

1 in cell culture, where interactions between different tissues and cell types are not easily  
2 modelled. The zebrafish offers an excellent genetic vertebrate model system for  
3 endocrine studies, and similar to humans, they are diurnal and use cortisol as the main  
4 glucocorticoid hormone (Weger *et al.*, 2016). Importantly, unlike other teleosts,  
5 zebrafish have only a single glucocorticoid (zGr) and mineralocorticoid receptor (Mr)  
6 (zMr) isoform (Faught and Vijayan, 2018). Moreover, zGr shares high structural and  
7 functional similarities to its human equivalent, making zebrafish a reliable model for  
8 studying glucocorticoids activity *in vivo* (Alsop and Vijayan, 2008; Chatzopoulou *et al.*,  
9 2015; Xie *et al.*, 2019). Additionally, zebrafish share all the components of the human  
10 HIF signalling pathway and it has been proved to be a very informative and genetically  
11 tractable organism for studying hypoxia and HIF pathway both in physiological and  
12 pathophysiological conditions (van Rooijen *et al.*, 2011; Santhakumar *et al.*, 2012; P. M.  
13 Elks *et al.*, 2015).

14 In our previous work, we identified new activators of the HIF pathway, e.g.  
15 betamethasone, a synthetic glucocorticoid receptor agonist (Vettori *et al.*, 2017).  
16 Counterintuitively, GR loss of function was shown by Facchinello and colleagues to  
17 hamper the transcriptional activity linked to immune-response (i.e of cytokines Il1 $\beta$ , Il8  
18 and Il6 and of the metalloproteinase Mmp-13) (Facchinello *et al.*, 2017). Finally,  
19 glucocorticoid receptor has been also found to synergistically activate proinflammatory  
20 genes by interacting with other signalling pathways (Langlais *et al.*, 2008, 2012; Dittrich  
21 *et al.*, 2012; Xie *et al.*, 2019).

22 In the present study, we utilised both a genetic and pharmacological approach to  
23 alter these two pathways during the first 120 hours post fertilisation of zebrafish  
24 embryos. In particular, we took advantage of two different mutant lines we have  
25 generated (*hif1 $\beta$ <sup>sh544</sup> (arnt1)* and *gr<sup>sh543</sup> (nr3c1)* respectively), coupled to an already  
26 existing *vhl<sup>hu2117/+</sup>;phd3::EGFP<sup>i144/i144</sup>* hypoxia reporter line (Santhakumar *et al.*, 2012),  
27 to study the effect of HIF activity on GC signalling and vice-versa, via a “gain-of-  
28 function/loss-of-function” approach. Phenotypic and molecular analyses of these  
29 mutants have been accompanied by optical and fluorescence microscope imaging.

30 Importantly, we not only confirm that betamethasone is able to increase the  
31 expression of *phd3:eGFP*, a marker of HIF activation in our zebrafish HIF-reporter line,  
32 but we also show that BME-driven HIF response requires Hif1 $\beta$ /Arnt1 action to occur.  
33 Furthermore, our results also demonstrate that both Gr and Mr loss of function are able  
34 to partially rescue *vhl* phenotype, allowing us to confirm the importance of

1 glucocorticoids in assuring high HIF signalling levels. This finding may have wider  
2 significance in health and disease, as so far it is proven difficult to downregulate HIF  
3 signalling.

4 Our results also demonstrate that in the presence of upregulated HIF pathway  
5 (by mutating *vhl*), both the glucocorticoid receptor activity and the endogenous cortisol  
6 levels are repressed in 5 dpf larvae, whereas when the HIF pathway is suppressed (by  
7 mutating *hif1 $\beta$* ) they are significantly increased. Finally, qPCR analysis on GC target  
8 genes, *in situ* hybridisation on the expression of steroidogenic genes and cortisol  
9 quantification on the aforementioned mutant lines confirmed our hypothesis.

10 Taken together, these results allow us to deepen the knowledge of how the  
11 crosstalk between HIF and glucocorticoid pathway occurs *in vivo* and to underscore a  
12 new model of interaction between these two major signalling pathways.

13

## 14 Results

### 15 Generating *arnt1* and *arnt1;vhl* knockout in zebrafish:

16 To study the interplay between HIF and GC signalling *in vivo*, using a genetic  
17 approach, we required a Hif1 $\beta$ /Arnt1 mutant line (in a *phd3:eGFP;vhl<sup>+/-</sup>* background) to  
18 enable the downregulation of the HIF pathway. Hif-1 $\beta$  (hypoxia-inducible factor 1 beta,  
19 Arnt1) is a basic helix-loop-helix-PAS protein which translocates from the cytosol to the  
20 nucleus after ligand binding to Hif- $\alpha$  subunits, after the stabilization of the latter in the  
21 cytoplasm. It represents the most downstream protein in the HIF pathway and for this  
22 reason it is the most suitable target.

23 Using CRISPR mutagenesis we obtained a 7 bp insertion in exon 5 (coding bHLH DNA  
24 binding domain (DBD) of the Hif-1 $\beta$  protein; allele name sh544) in *vhl* heterozygote  
25 embryos (**Fig. 1A**). The resulting frameshift mutation was predicted to lead to a  
26 premature stop codon at the level of the DNA-binding domain, which would result in a  
27 severely truncated protein. The resulting line *hif1 $\beta$ <sup>sh544/+</sup>;vhl<sup>hu2117/+</sup>;phd3:eGFP<sup>i144/i144</sup>*  
28 will be called *arnt1<sup>+/-</sup>;vhl<sup>+/-</sup>*, whereas the *vhl<sup>hu2117/+</sup>;phd3:eGFP<sup>i144/i144</sup>* line will be called  
29 *vhl<sup>+/-</sup>* hereafter.

30 Initial analysis performed on *arnt1<sup>+/-</sup>;vhl<sup>+/-</sup>* incross-derived 5 dpf larvae (F1  
31 generation) confirmed the suppressive effect that *arnt1* mutation was expected to have  
32 on *vhl* mutants. Overall, *arnt1<sup>+/-</sup>;vhl<sup>+/-</sup>* larvae showed a substantially attenuated *vhl*  
33 phenotype, characterized by a reduced *phd3:eGFP* related brightness, especially in the

1 liver (**Fig. 1C'**), with the absence of pericardial edema, excessive caudal vasculature and  
2 normal yolk usage (**Fig.1C**) compared to *vhl*<sup>-/-</sup> larvae (**Fig. 1B and 1B'**). In particular,  
3 this was quantified as a 39% downregulation (P<0.0017) at the level of the head, a 75%  
4 downregulation (P<0.0001) in liver and a 58% downregulation (P<0.0001) in the rest  
5 of the body (from the anus to the caudal peduncle), in terms of *phd3:eGFP*-related  
6 brightness, compared to *vhl*<sup>-/-</sup> larvae (**Fig. 1C', 1B' and S1A,D**).

7 Furthermore, since homozygous *vhl* mutants are lethal by 8-10dpf (van Rooijen  
8 *et al.*, 2009), we analysed the efficacy of *arnt1* mutation in rescuing *vhl* phenotype. To  
9 this end, we attempted to raise *arnt1*<sup>-/-</sup>;*vhl*<sup>-/-</sup> after day 5 post fertilization. Notably,  
10 double mutants were able to survive beyond 15 dpf, but failed to grow and thrive when  
11 compared to their wild-type siblings, which led us to euthanise them due to health  
12 concerns at 26 dpf (**Fig. S1B**). Of note, *arnt1* homozygotes, in a *vhl*<sup>+/+</sup> or wt background,  
13 were morphologically indistinct and adults were viable and fertile. In contrast, the  
14 previously published *arnt2*<sup>-/-</sup> zebrafish larvae were embryonic lethal around 216 hpf  
15 (Hill *et al.*, 2009).

16

### 17 **Arnt1 and Arnt2 are mutually required for HIF signalling in zebrafish:**

18 As *arnt1*;*vhl* double mutants still activate the *phd3:eGFP* HIF reporter, we  
19 examined the importance of Arnt2 isoform in the HIF pathway. Phenotypic analysis was  
20 carried out on 5 dpf Arnt2 CRISPRs, created both in a *vhl*<sup>+/+</sup> and *arnt1*<sup>+/+</sup>;*vhl*<sup>+/+</sup>  
21 background, according to the protocol of Wu *et al.*, 2018. By analysing the expression of  
22 the *phd3:eGFP* transgene, we observed that *arnt2* CRISPR injected *vhl* mutants were  
23 characterized by a significant downregulation of *phd3:eGFP*-related brightness at the  
24 level of the head (equals to 53%, P<0.0001), in the liver (equals to 54%, P<0.0001) and  
25 in the rest of the body (equals to 46%, P<0.0001), compared to uninjected *vhl* mutant  
26 larvae (**Fig. 1H' compared to 1H, white asterisks; Fig. 1K**).

27 Furthermore, when both *arnt1* and *arnt2* isoforms were simultaneously knocked-out  
28 (**Fig. 1I'**), the downregulation was even stronger at the level of the head (equals to 74%,  
29 P<0.0001), the liver (equals to 86%, P<0.0001) and in the rest of the body (equals to  
30 83%, P<0.0001) (**Fig. 1I' compared to 1H; Fig. 1K**). Of note, *phd3:eGFP*-related  
31 brightness in these mutants was still slightly higher than wildtype, (not shown; these  
32 levels are undetectable). Overall, these data show that Arnt1, even if not fundamental  
33 for survival, is the main isoform in the zebrafish liver required for HIF signalling,  
34 whereas Arnt2 is more expressed in the developing central nervous system (CNS), as

1 reported by Hill et., al 2009. Of note, since both isoforms can form a functional complex  
2 with Hif- $\alpha$  isoforms and appear to function in the same organs, this allows us to confirm  
3 that they have partially overlapping functions *in vivo* and to show that they  
4 synergistically contribute to the HIF response.

5

#### 6 **Modulation of HIF signalling affects GR signalling:**

7 To investigate the interaction between HIF and glucocorticoid signalling, we  
8 quantified the expression of four potential glucocorticoid target genes from mammalian  
9 studies (*fkbp5*, *il6st*, *pck1* and *lipca*) both in a HIF upregulated (*vhl*<sup>-/-</sup>), and  
10 downregulated scenario (*arnt1*<sup>-/-</sup>) via RTqPCR analysis on 5 dpf larvae. We confirmed  
11 that in zebrafish larvae, *fkbp5* is the most sensitive and well-established readout of Gr  
12 activity (Schaaf, Chatzopoulou and Spaink, 2009; Chatzopoulou *et al.*, 2017; Facchinello  
13 *et al.*, 2017), whilst the other aforementioned genes do not directly take part in the GC-  
14 GR negative feedback loop. Therefore, we focused this analysis on *fkbp5*.

15 Interestingly, our analysis shows that the expression of *fkbp5* is downregulated  
16 (fold change=0.1; P=0.0035) in the presence of an upregulated HIF pathway (*vhl*<sup>-/-</sup>)  
17 compared to DMSO treated *vhl* siblings (**Fig. 2A**). Vice versa, when the HIF pathway is  
18 suppressed (*arnt1*<sup>-/-</sup>), *fkbp5* expression is upregulated (fold change=24.1; P<0.0001),  
19 compared to DMSO treated wild-type levels (**Fig. 2A'**).

20 To further examine the effect of HIF signalling on glucocorticoid responsiveness,  
21 we also performed betamethasone (BME) treatment [30  $\mu$ M] on the aforementioned  
22 mutant lines, followed by RTqPCR analysis. Of note, BME was able to increase *fkbp5*  
23 expression in *vhl* siblings and was only able to mildly do that in *vhl* mutants. Indeed, its  
24 induction levels appeared not only lower in BME treated *vhl* mutants (fold change=2.1)  
25 than in BME treated siblings (fold change=7, P=0.0286), but also its expression was not  
26 significantly different from DMSO treated wild-types (**Fig. 2A**). In contrast, when the  
27 HIF pathway was suppressed (*arnt1*<sup>-/-</sup>), BME treatment was able to further upregulate  
28 the expression of *fkbp5* (fold change=107,5; P=0.0031), compared to DMSO treated  
29 *arnt1* mutants (**Fig. 2A'**).

30 Collectively, we speculate that the upregulated HIF levels are able to repress the  
31 glucocorticoid receptor activity and can blunt its responsiveness to an exogenous GR  
32 agonist (BME treatment). On the other hand, importantly, although HIF activity is  
33 expected to be low in wild-type larvae in a normoxic environment, its function is also  
34 detectable with respect to suppression of GR activity. Indeed, if *arnt1* gene is knocked-



1 out (*arnt1*<sup>-/-</sup>) an increased GR sensitivity is observed (**Fig. 2A'**). To further test whether  
2 this had repercussions on steroidogenesis and/or cortisol levels, we analysed them  
3 both in a HIF upregulated (*vhl*<sup>-/-</sup>) and downregulated scenario (*arnt1*<sup>-/-</sup>).

4

#### 5 **HIF signalling acts as negative regulator of steroidogenesis:**

6 To investigate the relationship between HIF signalling and steroidogenesis, we  
7 initially performed *in situ* hybridization on larvae obtained from the *arnt1*<sup>+/-</sup> mutant  
8 line, using both *pro-opiomelanocortin* (*pomca*) and *Cytochrome P450 family 17*  
9 *polypeptide 2* (*cyp17a2*) as probes. Expression of *pomca*, at the level of the anterior part  
10 of the pituitary gland, is a well-established readout of GR function in zebrafish larvae.  
11 *Pomca* is negatively regulated by increased blood cortisol levels via GC-GR signalling, as  
12 part of the HPI axis feedback loop (Griffiths *et al.*, 2012; Ziv *et al.*, 2014). Previous work  
13 also suggested that HIF promotes POMC activity in the mouse hypothalamic region  
14 (Zhang *et al.*, 2011). On the other hand, *Cyp17a2* is an enzyme involved in steroid  
15 hormone biosynthesis at the level of the interrenal gland, which is activated upon ACTH  
16 stimulation (Ramamoorthy and Cidlowski, 2016; Eachus *et al.*, 2017; Weger *et al.*,  
17 2018).

18 We found that 5 dpf *arnt1*<sup>-/-</sup> larvae, which were characterized by an upregulated  
19 GC responsiveness, showed upregulated *cyp17a2* expression (**Fig. S3C-C'**) coupled to  
20 downregulated *pomca* (**Fig. 2C**). As expected, *arnt1* siblings showed normally expressed  
21 *cyp17a2* (**Fig. S3A-A'**) and *pomca* (**Fig. 2B**), which were observed to be downregulated  
22 only as a consequence of BME treatment (**Fig. S3B-B' and 2B'**). Therefore, we speculate  
23 that in the absence of *arnt1* (HIF suppressed scenario), *pomca* downregulation is most  
24 likely to occur as a consequence of GC-GR induced negative feedback loop, triggered by  
25 putative high cortisol levels (**Fig. 2A, 2G, DMSO, *arnt1* mutant**).

26 We subsequently examined both *pomca* and *cyp17a2* expression in the opposite -  
27 HIF upregulated- scenario, by performing WISH analysis on the *vhl* mutant line.  
28 Interestingly, 5 dpf *vhl*<sup>-/-</sup> larvae, which were characterized by a downregulated GR  
29 activity, displayed downregulated *cyp17a2* expression (**Fig. S3G-G'**), coupled to  
30 downregulated *pomca* expression (**Fig. 2E**). On the other hand, *vhl* siblings showed  
31 normally expressed *pomca* (**Fig. 2D**), which was observed to be downregulated after  
32 BME treatment, as expected (**Fig. 2D'**). Consequently, we speculate that in the absence  
33 of *vhl* (HIF upregulated scenario), *pomca* downregulation is most likely to occur as a

1 consequence of HIF-mediated downregulation of *pomca* expression. (**Fig. 2G, DMSO,**  
2 ***vhl* mutant**).

3 Cumulatively, if this is true, we predicted to observe reduced levels of  
4 endogenous cortisol in *vhl*<sup>-/-</sup> larvae and normal or even increased levels in *arnt1*<sup>-/-</sup> larvae  
5 at 5 dpf.

### 7 **Steroidogenesis is repressed in *vhl*<sup>-/-</sup> and derepressed in *arnt1*<sup>-/-</sup>:**

8 To confirm this hypothesis, we performed cortisol quantification on the  
9 aforementioned *vhl* and *arnt1* mutant lines. Interestingly, cortisol concentration was  
10 significantly reduced (P value <0.0028) in *vhl* mutant larvae (92,7 fg/larva), compared  
11 to *vhl* siblings (321 fg/larva) (**Fig. 2F**). Conversely, cortisol was significantly increased  
12 (P value <0.0001) in *arnt1* mutants (487.5 fg/larva), compared to *arnt1* siblings (325  
13 fg/larva) (**Fig. 2F'**).

14 Taken together, these data confirmed our hypothesis and showed for the first  
15 time that HIF signalling can act as negative regulator both of GR transcriptional activity  
16 and of steroidogenesis. Indeed, if only GR transcriptional activity was blocked by HIF,  
17 cortisol levels would be expected to be high in *vhl* mutants. This is because by blocking  
18 GR (i.e as occur in *gr*<sup>-/-</sup>), the GC-GR mediated negative feedback cannot occur, making  
19 larvae hypercortisolemic (Facchinello *et al.*, 2017; Faught and Vijayan, 2018).  
20 Interestingly, since *vhl*<sup>-/-</sup> larvae are characterized both by downregulated cortisol levels  
21 and GR transcriptional activity, this strongly suggests that HIF signalling can act both at  
22 the hypothalamic level (to inhibit *pomca* expression) and intracellularly to block GR  
23 transcriptional activity itself.

24

### 25 **Generating *gr* and *gr;vhl* knockout in zebrafish:**

26 Conversely, to investigate the role of glucocorticoids on the HIF response, we  
27 created a novel glucocorticoid receptor (*gr*, *nr3c1*) mutant line and we crossed it with  
28 the *vhl*<sup>hu2117/+;phd3::EGFP<sup>i144/i144</sup></sup> hypoxia reporter line (this line will be called *gr*<sup>+/-</sup>;*vhl*<sup>+/-</sup>  
29 hereafter). We created this line because the existing *gr*<sup>s357</sup> allele may still have some  
30 activity via non-genomic pathways or tethering, promoting HIF activation upon GC  
31 treatment (Griffiths *et al.*, 2012; Ziv *et al.*, 2012; Vettori *et al.*, 2017). Of note, *gr* mutants  
32 are hypercortisolemic (Facchinello *et al.*, 2017; Faught and Vijayan, 2018). This is due to  
33 the inability of glucocorticoids to bind to a functional receptor (GR). As a result, they fail  
34 to provide negative feedback and are not able to shut down GC biosynthesis

1 (Facchinello *et al.*, 2017; Faught and Vijayan, 2018). We generated an 11 bp deletion at  
2 the level of *gr* exon 3, which is predicted to truncate the DNA binding domain, lacks the  
3 C-terminal ligand binding domain and is predicted to be a true null (**Fig. 3A**). The  
4 homozygous *gr/nr3c1* mutants, characterized during the first 5 dpf, were  
5 morphologically similar to control siblings and adult fish were viable and fertile, as  
6 predicted (Facchinello *et al.*, 2017).

7 To confirm loss-of-function, we initially subjected larvae to a visual background  
8 adaptation (VBA) test, as it is linked to impaired glucocorticoid biosynthesis and action  
9 (Griffiths *et al.*, 2012; Muto *et al.*, 2013). Larvae derived from *gr*<sup>+/-</sup> incross were VBA  
10 tested and sorted according to melanophore size at 5 dpf. PCR-based genotyping on  
11 negative VBA-response sorted samples revealed that most larvae were homozygous for  
12 the *gr* allele, whereas positive VBA-response samples were always *gr* siblings.

13 Furthermore, WISH analysis performed on 5 dpf DMSO and BME treated *gr*<sup>+/-</sup>  
14 incross derived larvae using *pomca* as probe, showed the presence of upregulated  
15 *pomca* expression in DMSO treated *gr*<sup>-/-</sup> at the level of the anterior part of the pituitary  
16 gland (**Fig. 3C**), compared to wild-type siblings (**Fig. 3B**). Of note, BME treatment was  
17 not able to downregulate *pomca* levels in *gr*<sup>-/-</sup> (**Fig. 3C'**), as it occurs in BME treated  
18 siblings (**Fig. 3B'**) via GC-GR mediated negative feedback loop, due to the absence of a  
19 functional *gr* allele. Finally, the loss of function was also determined in 5 dpf *gr* mutants  
20 by the strong downregulation of *fkbp5* mRNA levels quantified via RTqPCR, both in the  
21 presence (fold change=0.01; P<0.0001) and in the absence of BME treatment (DMSO  
22 treated, fold change=0.01; P<0.0001), compared to DMSO treated wildtypes (**Fig. 3D**).

23

#### 24 ***gr* mutation partially rescues *vhl* phenotype:**

25 We next analyzed the effect of *gr* loss of function on *vhl* phenotype. Phenotypic  
26 analysis carried out on 5 dpf larvae, derived from *gr*<sup>+/-</sup>;*vhl*<sup>+/-</sup> incross, revealed that *nr3c1*  
27 mutation was able to cause an efficient, but not complete rescue of *vhl* phenotype, in a  
28 way which resembled *arnt1* mutation (**Fig. 3F'-G'**).

29 In particular, 5 dpf *gr*<sup>-/-</sup>;*vhl*<sup>-/-</sup> larvae showed a 43% downregulation at the level of  
30 the head (P<0.0001), a 66% downregulation in the liver (P<0.0001) and a 51%  
31 downregulation in the tail (from the anus to the caudal peduncle) (P=0.0020), in terms  
32 of *phd3::EGFP*-related brightness, compared to *vhl*<sup>-/-</sup> larvae (**Fig. 3G' compared to 3E'**  
33 **and S4A**). As expected, 5 dpf double mutant larvae were unable to respond to BME [30

1  $\mu\text{M}$ ] treatment (**Fig. 3J-3J' and S4A**), as also confirmed via RTqPCR analysis on HIF  
2 (*vegfab* and *egln3*) and GC target genes (*fkbp5*) (**Fig. 3H**).

3 Rescue was also apparent by morphology. Indeed, even if *gr*<sup>-/-</sup>;*vhl*<sup>-/-</sup> showed  
4 reduced yolk usage, they displayed a reduction in ectopic vessel formation at the level of  
5 the dorsal tailfin, no pericardial edema, and developed air-filled swim bladders (**Fig. 3G**  
6 **and 3E**). Moreover, whilst *vhl* mutants are inevitably deceased by 10 dpf (van Rooijen  
7 *et al.*, 2009), we were able to raise all selected double mutants beyond 15 dpf, but then  
8 (similarly to *arnt1*<sup>-/-</sup>;*vhl*<sup>-/-</sup>) they failed to grow and thrive when compared to their  
9 siblings. This led us to euthanise them due to health concerns at 21 dpf (**Fig. S4B**).  
10 Together, these data indicate for the first time, in our *in vivo* animal model, that GR  
11 function is essential for HIF signalling in zebrafish larvae, particularly at the level of the  
12 head and the liver.

13

#### 14 ***gr* loss of function can further reduce HIF signaling in *arnt1*;*vhl* double mutants:**

15 The similarity of *gr* and *arnt1* mutations could mean they work in a single linear  
16 “pathway”. If true, mutation of both genes should not lead to a further attenuation of the  
17 reporter expression. To test this, we bred the *gr* mutant line with the *arnt1*;*vhl* double  
18 mutant line and we crossed *gr*<sup>+/-</sup>;*arnt1*<sup>+/-</sup>;*vhl*<sup>+/-</sup> triple mutant carriers. Phenotypic  
19 analysis carried out on 5 dpf *phd3:eGFP* positive larvae (n=488) showed a small class of  
20 larvae with an even more rescued phenotype and a stronger downregulation of  
21 *phd3:eGFP* related brightness compared both to *arnt1*<sup>-/-</sup>;*vhl*<sup>-/-</sup> (**Fig. 4B-B'**) and *gr*<sup>-/-</sup>;*vhl*<sup>-/-</sup>  
22 double mutants (**Fig. 4C-C'**). Of note, 7 putative very weak GFP<sup>+</sup> larvae were selected  
23 and genotypic analysis confirmed that 5 out of 7 were indeed *gr*<sup>-/-</sup>;*arnt1*<sup>-/-</sup>;*vhl*<sup>-/-</sup>. In  
24 particular, these triple mutants showed a 54% downregulation at the level of the head, a  
25 71% downregulation in the liver and a 72% downregulation in the tail region, in terms  
26 of *phd3:eGFP*-related brightness compared to *vhl*<sup>-/-</sup> (**Fig. 4D-D' and S5**). Thus, these data  
27 suggest that glucocorticoids are likely to interfere with both Arnt1 and Arnt2 mediated  
28 HIF signalling pathway.

29

#### 30 **The BME-induced HIF response is Arnt1 dependent:**

31 To further examine the effect of glucocorticoids on HIF signalling, we performed  
32 BME [30  $\mu\text{M}$ ] treatment on all the available mutant lines. Of note, unlike cortisol,  
33 betamethasone has a very high affinity for Gr, but an insignificant affinity for Mr  
34 (Montgomery *et al.*, 1990; Fromage, 2012). As expected, 5 dpf wild-types larvae showed

1 a mild upregulation of *phd3:eGFP*-related brightness at the hepatic level, compared to  
2 untreated controls (**Fig. 1G' and 3L'**). BME treatment was also able to further increase  
3 *phd3:eGFP*-related brightness at the level of the head and the liver of 5 dpf *vhl*<sup>-/-</sup>, as also  
4 confirmed by WISH, using both lactate dehydrogenase A (*ldha*) (**Fig. 5B-B', black**  
5 **arrowheads**) and prolyl hydroxylase 3 (*phd3*) as probes (**Fig. 5D-D', black**  
6 **arrowheads**). As predicted, both *gr*<sup>-/-</sup> and *gr*<sup>-/-</sup>;*vhl*<sup>-/-</sup> mutants were unaffected due to the  
7 absence of functional Gr (**Fig. 3K-K' and 3J-J'**). Interestingly, in both the *arnt1*<sup>-/-</sup> (**Fig.**  
8 **1F**) and also *arnt1*<sup>-/-</sup>;*vhl*<sup>-/-</sup> (**Fig. 1E**) the *phd3:eGFP*-related brightness did not change  
9 after BME treatment (**Fig. 1E'-F'**). This was also confirmed via, RTqPCR analysis carried  
10 out on HIF target *egln3/phd3* in the *arnt1* mutant (**Fig. S1C**; see also *arnt1*<sup>-/-</sup>;*vhl*<sup>-/-</sup> **Fig.**  
11 **3H**)

12 Taken together these data suggest that in *vhl*<sup>-/-</sup> larvae, BME treatment can  
13 upregulate HIF signalling by “bypassing” HIF-mediated *pomca* negative regulation. By  
14 directly binding to Gr, it can compensate for the repressed cortisol levels in *vhl* mutants.  
15 (**Fig. 2F**). On the other hand, both in *arnt1*<sup>-/-</sup> and also *arnt1*<sup>-/-</sup>;*vhl*<sup>-/-</sup> larvae, even if BME  
16 can act downstream of *pomca*, it can only upregulate GR responsiveness, but cannot  
17 upregulate HIF signalling due to *arnt1* loss of function. Cumulatively, we speculate that  
18 even if Arnt2 can interact with the HIF- $\alpha$  isoforms to maintain a moderately  
19 upregulated HIF levels (*arnt1*<sup>-/-</sup>;*vhl*<sup>-/-</sup>), the BME-mediated HIF upregulation is Arnt1  
20 dependent.

21

## 22 ***gr* mutation overrides HIF-mediated *pomca* suppression in a *vhl* deficient** 23 **background**

24 To examine the effect of *gr* loss of function on steroidogenesis in *gr*<sup>-/-</sup>;*vhl*<sup>-/-</sup>, we  
25 performed WISH analysis on 5 dpf *gr*<sup>+/-</sup>;*vhl*<sup>+/-</sup> incross derived larvae, using *pomca* as  
26 probe. As expected, *vhl*<sup>-/-</sup> showed downregulated *pomca* expression (**Fig. 4G**), whereas  
27 *gr*<sup>-/-</sup> displayed upregulated *pomca* (**Fig. 4H**), compared to wildtypes (**Fig. 4F**). Notably,  
28 since a strong upregulation of *pro-opiomelanocortin a* was observed in the double  
29 mutants (**Fig. 4I**), this suggests that *gr* mutation overrides HIF-mediated *pomca*  
30 inhibition. PCR-analysis performed post-WISH confirmed this genotype-phenotype  
31 correlation.

32 These data, in accordance with our hypothesis, suggest that in *gr*<sup>-/-</sup>;*vhl*<sup>-/-</sup> mutants  
33 the upregulation of *pomca*, triggered by the absence of functional Gr (and of the GC-Gr  
34 mediated negative feedback), cannot be inhibited with the same efficiency by HIF

1 activity at the hypothalamic level. In *gr<sup>-/-</sup>;vhl<sup>-/-</sup>* mutants, we speculate that the  
2 upregulated endogenous cortisol interacts with Mr to stimulate the HIF pathway,  
3 resulting in a mildly upregulated *phd3:EGFP* expression, in-between the levels seen in  
4 *vhl* mutants and wild-type larvae (**Fig. 3J and 3I**). To test this assumption, we set up to  
5 block the *mr* gene in a *gr<sup>-/-</sup>;vhl<sup>-/-</sup>* background, in order to check the importance of Mr in  
6 the HIF signaling pathway.

7

### 8 **Both Gr and Mr are directly required in the HIF signalling pathway:**

9 Cortisol has high affinity both for Gr and Mr and they have been recently shown  
10 to be differentially involved in the regulation of stress axis activation and function in  
11 zebrafish (Faught and Vijayan, 2018). Therefore, we analysed the role of Mr on the HIF  
12 signaling pathway. To achieve this, we knocked-out *mr* in *gr<sup>+/-</sup>;vhl<sup>+/-</sup>;phd3:eGFP* incross-  
13 derived embryos, using CRISPR technology (Burger *et al.*, 2016; Wu *et al.*, 2018).  
14 Interestingly, phenotypic analysis performed on 5 dpf injected and uninjected larvae  
15 revealed that *mr* CRISPR injected *vhl* mutants were characterized by a significant  
16 downregulation of *phd3:eGFP*-related brightness at the level of the head (equals to 49%,  
17  $P < 0.0001$ ), in the liver (equals to 56%,  $P < 0.0001$ ) and in the rest of the body (equals to  
18 47%,  $P < 0.0001$ ), compared to *vhl<sup>-/-</sup>* mutant uninjected larvae (**Fig. 6D compared to**  
19 **6A**). Moreover, when both *gr* and *mr* were knocked-out, the downregulation was even  
20 stronger at the level of the head (equals to 62%,  $P < 0.0001$ ), in the liver (equals to 77%,  
21  $P < 0.0001$ ) and in the rest of the body (equals to 63%,  $P < 0.0001$ ) compared to *vhl<sup>-/-</sup>*  
22 mutant uninjected larvae (**Fig. 6E compared to 6A**). Of note, *mr* injection in *vhl<sup>-/-</sup>* larvae  
23 was more efficient in downregulation of *phd3:eGFP* expression compared to uninjected  
24 *gr<sup>-/-</sup>;vhl<sup>-/-</sup>* larvae at the level of the head (equals to 31%,  $P = 0.0087$ ) (**Fig. 6D compared**  
25 **to 6B**).

26 To test the reliability of CRISPR method, we chose to knock-out a gene (which  
27 was not involved in the HIF pathway) into *vhl<sup>+/-</sup>* incross derived embryos, to test  
28 whether it was able to affect HIF signalling. *Laminin, beta 1b (lamb1b)*, which codes for  
29 an extracellular matrix glycoprotein, was injected as CRISPR-injection control in *vhl<sup>+/-</sup>*  
30 incross derived embryos at 1 cell stage. Genotypic analysis carried out on these larvae  
31 confirmed that these guides were effective. Finally, quantification of *phd3:eGFP*-related  
32 brightness performed on 5 dpf injected and uninjected *vhl<sup>-/-</sup>* larvae, showed no  
33 significant differences between the two groups (**Fig. S6A and 6C**). Overall, these data  
34 corroborated the efficiency of the CRISPR method and, at the same time, confirmed

1 that both glucocorticoid and mineralocorticoid receptor play a pivotal role in the HIF  
2 signalling *in vivo*.

3

4

5

6

7

## 8 **Discussion**

9 Both HIF and glucocorticoid mediated transcriptional responses play a pivotal  
10 role in tissue homeostasis, glucose metabolism and in the regulation of cellular  
11 responses to various forms of stress and inflammation (Chrousos and Kino, 2009;  
12 Revollo and Cidlowski, 2009; Wilson et al., 2016). Previous *in vitro* studies highlighted  
13 the potential for crosstalk between HIF and glucocorticoid pathways, however there are  
14 still conflicting data on how this interaction occurs *in vivo* and there is no information  
15 on Mr contribution to HIF signalling. In this regard, we have presented a novel *in vivo*  
16 study using zebrafish larvae, focusing on the crosstalk between these two pathways. In  
17 contrast to *in vitro* cell culture studies, a whole animal study allows us to consider the  
18 interactions that occur between various tissues and provide novel insights. To this end,  
19 we generated *arnt1* and *gr* null mutants to downregulate HIF and GR signalling  
20 respectively, as a basis for a genetic analysis of this crosstalk.

21 As a prelude to this, we had to establish the relative importance of *arnt1* and  
22 *arnt2* in the overall HIF response. To achieve this, a discriminative test was devised to  
23 place them in a *vhl* mutant background, where HIF signaling is strongly upregulated  
24 (van Rooijen *et al.*, 2011; Santhakumar *et al.*, 2012). Phenotypic analysis performed on 5  
25 dpf *arnt1<sup>-/-</sup>;vhl<sup>-/-</sup>* larvae showed reduced *phd3:eGFP* related brightness, normal yolk  
26 usage, properly developed and air-filled swim bladder as well as by the absence of  
27 pericardial oedema and excessive caudal vasculature. However, beyond 5 days, these  
28 double mutants exhibited only partial recovery from the *vhl* phenotype. Indeed, they  
29 developed well till 15 dpf, but subsequently failed to grow and thrive when compared to  
30 their siblings. In addition, *arnt1* homozygous mutants were found to be viable and  
31 fertile, in contrast to both homozygous *vhl* and *arnt2* mutants, which are embryonic  
32 lethal by 8-10 dpf (Hill *et al.*, 2009; van Rooijen *et al.*, 2009).

1 Even though Arnt1 is not fundamental for survival, we found that it is required  
2 in the liver and in organs outside the central nervous system for HIF- $\alpha$  function.  
3 Conversely, using CRISPR technology (Burger *et al.*, 2016; Wu *et al.*, 2018), we  
4 established that Arnt2 is mainly required in the developing central nervous system  
5 (CNS), as also reported by Hill *et al.* in 2009. However, the similarities observed in  
6 terms of *phd3:eGFP*-induced brightness in both *arnt1*<sup>-/-</sup>;*vhl*<sup>-/-</sup> and *arnt2* CRISPR injected  
7 *vhl* mutants, suggest there is no strong functional separation. Therefore, both Arnt2 and  
8 Arnt1 have partially overlapping functions *in vivo* and both contribute to the HIF  
9 response.

10

### 11 **The effect of HIF signalling on the glucocorticoid pathway:**

12 We next investigated the effect of HIF signalling and glucocorticoid  
13 responsiveness, by performing RTqPCR analysis on 5 dpf larvae. Collectively, we show  
14 that strong activation of HIF signalling (in *vhl*<sup>-/-</sup>) is able to blunt glucocorticoid receptor  
15 transcriptional regulation as judged by *fkbp5* expression, whereas *arnt1* loss of function  
16 derepressed it. As our experiments are done at normal atmospheric oxygen levels, we  
17 conclude from the latter result that normoxic HIF activity nevertheless suffices to  
18 attenuate GR transcriptional regulation.

19 We checked whether HIF signalling affects steroidogenesis. To this end, we  
20 quantified the expression of steroidogenesis-related genes (*pomca* and *cyp17a2*) both in  
21 *vhl*<sup>-/-</sup> and in *arnt1*<sup>-/-</sup> larvae, via whole-mount *in situ* hybridization. Surprisingly, both  
22 lines showed downregulation of *pomca* expression. However, *arnt1*<sup>-/-</sup> larvae showed  
23 upregulated *cyp17a2* expression, whereas *vhl*<sup>-/-</sup> larvae, were characterized by  
24 downregulated *cyp17a2*.

25 Considering our results with GR-target *fkbp5* in these mutants, we assume that in  
26 an *arnt1* knock-out scenario, *pomca* downregulation occurs as a consequence of the  
27 GC/GR-mediated negative feedback loop aimed to control cortisol biosynthesis. This is  
28 also consistent with a significant upregulated basal cortisol levels quantified in these  
29 mutants. Vice versa, when HIF signalling is upregulated (in *vhl* mutants) we speculate  
30 that *pomca* and *cyp17a2* downregulation may occur via HIF-mediated activity, leading  
31 to the observed low cortisol levels coupled to suppressed GR activity.

32 Indeed, glucocorticoids regulate a plethora of physiological processes, act on  
33 nearly every tissue and organ in the body to maintain homeostasis and are  
34 characterized by a potent anti-inflammatory and immunosuppressive actions. For these



1 reasons, their secretion must be finely controlled by the HPA/I axis (Oakley and  
2 Cidlowski, 2013).

3 As previous work in our laboratory showed that glucocorticoids also act as HIF  
4 activators (Santhakumar *et al.*, 2012; Vettori *et al.*, 2017), we infer that HIF can in turn  
5 control GC levels by acting on *pomca*. This would enable HIF signalling not only to  
6 control its own levels, but also to assure homeostasis. Finally, since HIF signalling is a  
7 master regulator of cellular pro-inflammatory responses to hypoxia (Imtiyaz and Simon,  
8 2010; Eltzschig and Carmeliet, 2011; Palazon *et al.*, 2014), which would counteract the  
9 anti-inflammatory glucocorticoid activity, we speculate that the simultaneous  
10 expression of both upregulated HIF and GC pathway would be detrimental to  
11 homeostasis.

12 Our data would also be in accordance with a previous study showing that  
13 hypoxia exposure resulted in downregulation of steroidogenic genes (*StAR*, *cyp11c1*,  
14 *hmgcr*, *hsd17b2*, *cyp19a*, *cyp19b*) in 72 hpf larvae, whereas zHIF- $\alpha$  loss of function  
15 triggered the upregulation specifically of *StAR*, *cyp11b2* and *cyp17a1* (Tan *et al.*, 2017).

16 Cumulatively, if this is true, we predicted to observe reduced levels of  
17 endogenous glucocorticoids in *vhl*<sup>-/-</sup> and normal or even increased levels in *arnt1*<sup>-/-</sup>.  
18 Importantly, the fact that cortisol levels were lowered in *vhl* mutants and were  
19 upregulated in *arnt1* mutants is consistent with our hypothesis.

20 As a consequence of the above considerations, the HIF-mediated *pomca* negative  
21 regulation seems to be a logic homeostatic interaction: Increased HIF reduces GR  
22 activity, which in turn should lead to less HIF signalling.

23

#### 24 **The effect of glucocorticoids on the HIF signaling pathway:**

25 To further investigate the role of glucocorticoids on the HIF signalling, we  
26 initially analyzed the effect of *gr* loss of function on *vhl* phenotype. Surprisingly, we  
27 observed that *gr* mutation was able to cause an efficient, but not complete rescue of the  
28 *vhl* phenotype. Notably, *gr*<sup>-/-</sup>;*vhl*<sup>-/-</sup> survived much longer than *vhl*<sup>-/-</sup> ( $\geq 21$  dpf compared  
29 to max. 10 dpf), but then similar to *arnt1*<sup>-/-</sup>;*vhl*<sup>-/-</sup>, they failed to grow and thrive when  
30 compared to siblings. Our previous work (Vettori *et al.*, 2017) established that  
31 activation of GR signalling negatively regulates VHL protein in human liver cells. Our  
32 current genetic analysis shows that in zebrafish larvae, there must be an additional  
33 point of interaction between these two pathways, as we observed further activation of

1 our HIF reporter after GR treatment even in the absence of VHL. Cumulatively, we  
2 showed for the first time in an *in vivo* animal model that Gr is fundamental to allow high  
3 HIF signalling levels.

4 We next analysed the effect of betamethasone treatment in *arnt1*<sup>-/-</sup>. Although  
5 BME activated the GR target *fkbp5*, as expected, it failed to activate HIF signaling  
6 (Vettori et al., 2017). This was unexpected and would be best explained by assuming  
7 that a Gr-BME complex would preferentially interact with a HIF $\alpha$ /ARNT1 complex but  
8 not a HIF $\alpha$ /ARNT2 complex. Whether this holds up in mammalian cells would be  
9 interesting to address.

10

### 11 **Evaluation of mineralocorticoid receptor contribution to HIF signalling:**

12 Recent work published by Faught and Vijayan, 2018 showed that both Gr and Mr  
13 are involved in the regulation of zebrafish stress axis activation and function (Faught  
14 and Vijayan, 2018). Nothing is known about mineralocorticoid receptor contribution to  
15 HIF signalling. Therefore, we tested the effect of *mr* knock-out in *gr*<sup>+/-</sup>;*vhl*<sup>+/-</sup>;*phd3:EGFP*  
16 incrossed derived embryos. Interestingly, in *mr* injected- *vhl*<sup>-/-</sup> we observed a significant  
17 reduction of *phd3:eGFP*-related brightness, compared to uninjected *vhl*<sup>-/-</sup> larvae.  
18 Moreover, a further reduction of *phd3:eGFP* expression was found at the level of the  
19 head in *mr* injected- *vhl*<sup>-/-</sup> compared to *gr*<sup>-/-</sup>;*vhl*<sup>-/-</sup> larvae. Finally, the additional removal  
20 of *mr* in a *gr*<sup>-/-</sup>;*vhl*<sup>-/-</sup> background could reduce the hypoxia reporter expression even  
21 further.

22 Therefore, we were able to show that both the glucocorticoid receptor and  
23 mineralocorticoid receptor play a pivotal role in promoting HIF signaling in zebrafish.  
24 In contrast to mammals, teleosts lack aldosterone and cortisol is the primary  
25 glucocorticoid hormone that can interact both with Gr and Mr to assure a correct HPI  
26 axis activity (Cruz *et al.*, 2013; Baker and Katsu, 2017). Of note, Mr was shown to not  
27 have a role in rapid non-genomic behaviors that required HPI axis signaling in zebrafish  
28 (Lee *et al.*, 2019). However, our hypothesis is consistent with Faught and Vijayan, 2018  
29 elegant work, showing that both Gr and Mr signalling are involved in the GC negative  
30 feedback regulation. Importantly, this outcome may have a wider significance in health  
31 and disease. This is because so far, the HIF signalling, which play a key role in tumour  
32 growth, is proven difficult to downregulate. In this regard, our study suggests that  
33 modulation of Gr and Mr might be a potential avenue. In conclusion, although Mr

1 contribution to HIF response in other organisms remains unclear, our work suggests  
2 that research into its function is warranted.

3

## 4 **Conclusion**

5 Our present study stresses the importance of the glucocorticoid pathway in  
6 driving HIF signalling. In addition, we uncovered a negative regulatory role played by  
7 HIF in regulating both GR responsiveness and steroidogenesis as demonstrated via  
8 RTqPCR and steroid hormone quantification. We also identify a mineralocorticoid  
9 receptor contribution to HIF-GC crosstalk. Finally, we presented novel *gr*<sup>+/-</sup>;*vhl*<sup>+/-</sup>,  
10 *arnt1*<sup>+/-</sup>;*vhl*<sup>+/-</sup> and *arnt1*<sup>+/-</sup>;*gr*<sup>+/-</sup>;*vhl*<sup>+/-</sup> zebrafish mutant lines which helped to better  
11 understand how the interplay between HIF and glucocorticoids occur *in vivo*. For these  
12 reasons, we believe that this work could pave the way for further *in vivo* analysis to  
13 precisely identify the extensive crosstalk behind these two major signalling pathways.

14

## 15 **Materials and methods**

### 16 **Zebrafish husbandry and maintenance:**

17 Zebrafish (*Danio rerio*) lines were raised and maintained under standard conditions (14  
18 hours of light and 10 hours of dark cycle, at 28°C) in the Aquaria facility of the  
19 University of Sheffield. Zebrafish embryos used for experiments were reared in E3  
20 medium (5 mM NaCl, 0.17 mM KCl, 0.33 mM MgCl<sub>2</sub>, 0.33 mM CaCl<sub>2</sub>, pH 7.2) with or  
21 without methylene blue (Sigma-Aldrich) and staged according to standard methods  
22 (Kimmel *et al.*, 1995) for up to 5,2 days post fertilisation (dpf) in accordance with UK  
23 Home Office legislation. Our studies conform with the UK Home Office guidelines  
24 (ASPA), Licence No. PC9C3D4CB and PB2866ED0. Ethics approval was obtained from  
25 the University of Sheffield Ethics committee AWERB.

26

### 27 **Zebrafish strains:**

28 The following zebrafish lines were used: wild-type (wt) strain AB (ZDB-GENO-960809-  
29 7), *vhl*<sup>hu2117/+</sup>;*phd3:eGFP*<sup>i144/i144</sup> (ZDB-GENO-090611-18), *hif1β*<sup>sh544/+</sup>;  
30 *hif1β*<sup>sh544/+</sup>;*vhl*<sup>hu2117/+</sup>, *gr*<sup>sh543/+</sup>, *gr*<sup>sh543/+</sup>;*vhl*<sup>hu2117/+</sup>, *gr*<sup>sh543/+</sup>;*hif1β*<sup>sh544/+</sup>, and  
31 *gr*<sup>sh543/+</sup>;*hif1β*<sup>sh544/+</sup>;*vhl*<sup>hu2117/+</sup> lines were generally maintained in a *phd3:EGFP*<sup>i144/+</sup>  
32 background. The following 4x gRNAs CRISPR-injected G0 null mutant lines were created

1 according to Wu et al, 2018 protocol and raised up to to 5,2 dpf:  
2 *mr;gr<sup>sh543/+</sup>;vh<sup>lhu2117/+</sup>;phd3:eGFP<sup>i144/+</sup>*, *hif1 $\beta$ 2;1hif1 $\beta$ <sup>sh544/+</sup>;vh<sup>lhu2117/+</sup>;phd3:eGFP<sup>i144/+</sup>* and  
3 *lamb1b;vh<sup>lhu2117/+</sup>;phd3:eGFP<sup>i144/+</sup>* (used as CRISPR injection control).

4

#### 5 **Generation of *gr* (*nr3c1*) and *hif1 $\beta$* (*arnt1*) null zebrafish lines:**

6 Both *nr3c1* mutant line (*gr<sup>sh543/+</sup>*) and *arnt1* mutant line (*hif1 $\beta$ <sup>sh544/+</sup>*) were generated  
7 using the CRISPR/Cas9-based mutagenesis method. A gene-specific guide RNA (sgRNA)  
8 sequence was identified using the CHOPCHOP website (Montague *et al.*, 2014; Labun *et*  
9 *al.*, 2016). To design both *gr* and *arnt1* sgRNA, an 18 nucleotides sequence upstream to  
10 a selected PAM site (*gr<sup>sh543</sup>*: CCAGCTGACGATGTGGCAG; *hif1 $\beta$ <sup>sh544</sup>*:  
11 TCGGTGCTGGTGTTCAG) was inserted into a scaffold sequence (Hruscha *et al.*, 2013),  
12 containing a promoter for the T7 Polymerase. The sgRNA was amplified via PCR,  
13 purified from agarose gel and *in vitro* transcribed using MEGAshortscript T7 kit  
14 (Ambion). 1 nl of CRISPR mixture containing 2,4  $\mu$ g/ $\mu$ l of gRNA and 0.5  $\mu$ l Cas9 protein  
15 (NEB) was injected in one-cell stage embryos and raised for 24 hours. Wild-type (wt),  
16 strain AB embryos were used to generate the *gr* mutant line, whereas  
17 *vh<sup>lhu2117/+</sup>;phd3:eGFP<sup>i144/+</sup>* incross-derived embryos were used to create the *hif1 $\beta$*   
18 mutant line. Efficiency was verified via whole-embryo PCR-based genotyping, by a  
19 diagnostic restriction digest. Injected embryos were raised to adulthood. Embryos  
20 collected from transmitting G0 founders crossed with WT(AB) fish were raised and  
21 genotyped to confirm germline transmission of the mutation (F1 generation).  
22 Heterozygous mutants, carrying the same mutation, were selected and crossed to obtain  
23 homozygous mutant embryos (F2 generation).

24

#### 25 **Generation of CRISPR/Cas9-mediated mutants (CRISPANTs):**

26 To generate G0 knockout embryos we used the method developed by Burger et al 2016  
27 and improved by Wu et al., 2018. In short, a pool of four guide-RNAs (25 $\mu$ M each, Sigma  
28 Aldrich) were co-injected with 0.5  $\mu$ l Cas9 protein (NEB, M0386, 20 $\mu$ M), diluted 1:10  
29 and 1  $\mu$ l tracrRNA (100 $\mu$ M) in one-cell stage embryos. This method was used to create  
30 G0 CRISPANTs for the following genes of interest: *mineralocorticoid receptor* (*mr*,  
31 *nr3c2*), *aryl hydrocarbon receptor nuclear translocator 2* (*arnt2*, *hif1 $\beta$ 2*) and *laminin*,  
32 *beta 1b* (*lamb1b*). The latter was used as CRISPR-injection control. The gRNA target  
33 sequences used in this study are as follows: *arnt2*: gRNA1-ACGGCGCCTACAAACCCTCC

1 (exon 5), gRNA2-GGCCGATGGCTTCTTGTTTCG (exon6), gRNA3-  
2 TTCACGCCACAATTCGGATG (exon11), gRNA4-GTCGCAGGTGCGTAAAAACA (exon 14);  
3 *nr3c2*: gRNA1-GCATTGTGGGGTCCCTCCA (exon 2), gRNA2-  
4 AAGGGGATTAACAGGAAAC (exon 2), gRNA3-CAACCAGCTCGCCGGAAAC (exon 5),  
5 gRNA4-ATATCTGACGCCGTCCGTCT (exon 5); *lamb1b* gRNA1-  
6 TTGTTAATAGCATAGTACATTGG (sequence upstream 5'UTR), gRNA2-  
7 GGAGAACAAGCAAAACGATGAGG (ATG), gRNA3- GCGTGGTGCAGGGTTTGTAG (5'UTR),  
8 gRNA4- TCACAATGACATGTGTGCG (exon 2). The success of the injection was  
9 determined via phenotypic analysis, followed by quantification of *phd3:eGFP* related  
10 brightness and whole-embryo PCR-based genotyping performed on a fraction of  
11 injected embryos at 5 dpf.

12

### 13 **Whole-mount *in situ* hybridisation:**

14 Whole-mount *in situ* hybridization (WISH) was performed according to standard  
15 protocols (Thisse and Thisse, 2008). The following antisense RNA probes were used:  
16 *proopiomelanocortin a (pomca)* created as previously described (Muthu *et al.*, 2016);  
17 *Cytochrome P450 family 17 polypeptide 2 (cyp17a2)*, created as previously described  
18 (Eachus *et al.*, 2017), both *prolyl hydroxylase 3 (phd3; BC066699)*, and *lactate*  
19 *dehydrogenase A (ldha1; BC067188)* probes, generated as previously described (van  
20 Rooijen *et al.*, 2009; Santhakumar *et al.*, 2012).

21

### 22 **Embryos harvesting, drug treatment and fixation for WISH:**

23 Embryos intended for whole-mount *in situ* hybridisation were treated with 16,8 µl of 1-  
24 phenyl 2-thiourea (PTU, stock concentration 75mg/ml) diluted into 35 ml E3 medium  
25 to inhibit melanogenesis, according to Karlsson *et al.*, 2001. GR agonist treatment was  
26 performed on batches of 15 embryos each, at 4 dpf, treated in 6-well plates, with 30 µM  
27 Betamethasone 17,21-dipropionate (BME) and with 1% DMSO (Sigma-Aldrich), as  
28 control, for 24 hours (Griffiths *et al.*, 2012). Inside the 6-well plates, embryos were  
29 incubated in 3 ml total volume of E3 medium, without methylene blue. Afterwards, up  
30 to 30 embryos at 5 dpf were collected in 1,5 ml Eppendorf tubes and anaesthetized  
31 using Tricaine Solution (MS-222, Sigma Aldrich) prior to fixation in 1 ml 4% PFA  
32 solution overnight, at 4°C. Embryos were then washed twice for 10 minutes in PBST and  
33 post-fixed in 1 ml 100% MeOH. Finally, samples were stored at -20°C.

34

1 ***gr<sup>sh543</sup>* mutants sorting by visual background adaptation (VBA):**

2 Visual background adaptation (VBA) is a glucocorticoid receptor-dependent  
3 neuroendocrine response which causes zebrafish melanocytes to shrink when exposed  
4 to bright illumination (Kramer *et al.*, 2001; Kurrasch *et al.*, 2009). To identify *gr<sup>sh543</sup>*  
5 mutants from siblings and to confirm the absence of a functional VBA response, 5dpf  
6 larvae were exposed to 30 minutes darkness and then transferred onto a white  
7 background under bright, whole-field illumination, using a 30W fluorescent lamp  
8 mounted 50 cm above the dish (Muto *et al.*, 2005; Hatamoto and Shingyoji, 2008).

9

10 **Cortisol extraction and quantification:**

11 Three biological replicates of 150 larvae at 5 dpf each of *hif1 $\beta$ <sup>sh544</sup>* mutants, *hif1 $\beta$ <sup>sh544</sup>*  
12 siblings, *vh<sup>lhu2117</sup>* mutants and *vh<sup>lhu2117</sup>* siblings, respectively, were used for steroid  
13 hormone extraction and quantification. *vh<sup>l</sup>* larvae were sorted among siblings at 4 dpf  
14 according to both their phenotype and *phd3:eGFP*-related brightness. Because of the  
15 lack of visible phenotype, *arnt1<sup>-/-</sup>* larvae were derived from *arnt1<sup>-/-</sup>* fish incrossed,  
16 whereas siblings were from *arnt1<sup>+/-</sup>* fish crossed with *arnt1<sup>+/+</sup>* ones. Cortisol  
17 quantification was carried out according to the protocol published by Eachus *et al.*,  
18 2017 (Eachus *et al.*, 2017), based on the use of an Acquity UPLC System (Waters,  
19 Milford, CT) coupled to a Xevo TQ-S tandem mass spectrometer (Waters).

20

21 **RNA isolation, cDNA synthesis and qPCR analysis:**

22 Transcript abundance of target genes was measured by quantitative real-time PCR  
23 (RTqPCR). Three biological replicates of 10 larvae at 4 dpf each, were treated for 24  
24 hours with 30  $\mu$ M Betamethasone 17,21-dipropionate and with 1% DMSO, used as  
25 control, prior to RNA isolation. Total RNA was extracted from pools of 10 larvae at 5dpf  
26 with TRIzol reagent (Invitrogen by Thermo Fisher Scientific, 15596026). RNA extracted  
27 was quantified using a Nanodrop ND-1000 spectrophotometer. cDNA was then  
28 synthesized from 1 $\mu$ g RNA template through reverse transcription using Protoscript II  
29 First Strand cDNA Synthesis Kit (New England Biolabs), as recommended by  
30 manufacturer's instructions. All RTqPCR reactions were performed in triplicate using  
31 TaqMan probes™ in combination with CFX96 Touch™ Real-Time PCR Detection System  
32 (BioRad), paired with CFX Maestro™ Analysis Software.

33 Each reaction mixture (20  $\mu$ l) reaction mixture containing 1  $\mu$ l cDNA template  
34 (100ng/ml), 1  $\mu$ l FAM™ probe and 10  $\mu$ l TaqMan Universal Master Mix (Applied

1 biosystems by Thermo Fisher Scientific, Epsom, UK) was amplified as follows:  
2 denaturation at 95°C for 10 minutes and 39 cycles at 95°C for 15 seconds, 60°C for 30  
3 seconds. Four hypoxia-inducible factor pathway-dependent genes (*egln3*:  
4 Dr03095294\_m1, *pfkfb3*: Dr03133482\_m1, *vegfab*: Dr03072613\_m1 and *slc2a1a*:  
5 Dr03103605\_m1) and four glucocorticoid pathway-dependent target genes (*fkbp5*:  
6 Dr03114487\_m1, *il6st*: Dr03431389\_m1, *pck1*: Dr03152525\_m1 and *lipca*:  
7 Dr03113728\_m1) were quantified in the present study (Applied biosystems by Thermo  
8 Fisher Scientific, Epsom, UK).

9 Expression levels for each gene were normalized to *eef1a1* (Dr03432748\_m1) and/or  
10 *rps29* (Dr03152131\_m1) and fold change values were generated relative to wild-type  
11 DMSO treated control levels, according to  $\Delta\Delta$ CT method (Livak and Schmittgen, 2001).  
12 All data were expressed as fold change mean  $\pm$  s.e.m and  $P \leq 0.05$  was considered  
13 statistically significant.

14

15

#### 16 **Quantifying *phd3:eGFP*-related brightness:**

17 Images were acquired using Leica Application Suite version 4.9, which allowed the  
18 capture both of bright-field and GFP fluorescent images. To quantify the *phd3:eGFP*-  
19 related brightness of live embryos derived from each incrossed mutant line used in this  
20 project, Fiji (Image J) software v.2.0.0 was used. Images were converted into a grey  
21 scale 8-bit format and subsequently analysed by the software, by summing the grey  
22 values of all the pixels in the selected area, divided by the number of pixels. By default,  
23 since values equal 0 are assigned to black and values equal to 255 to white, the  
24 quantified mean grey values are proportional to the intensity of the eGFP-related  
25 brightness expressed in the embryos. In particular, head, liver and tail (from the anus to  
26 the caudal peduncle) related brightness were selected and measured in all the mutant  
27 lines used in this study (**Fig. S1D**). Genotyping post phenotypic analysis on *phd3:eGFP*  
28 sorted larvae confirmed the genotype-phenotype correlation.

29

#### 30 **Statistical analysis:**

31 GraphPad Prism version 8.0 for MacOS (GraphPad Software, La Jolla, California, USA,  
32 [www.graphpad.com](http://www.graphpad.com)) was used to perform statistical analysis on all the samples  
33 analysed. Unpaired t tests were used to test for significant differences between two  
34 sample groups (i.e cortisol quantification). One-way ANOVA was used for assessing

1 mean grey values data quantification, whereas two-way ANOVA was used to evaluate  
2 qPCR data. As post-hoc correction tests, Sidak's method for multiple comparisons was  
3 used on normally distributed populations following one-way ANOVA, while Dunnett's  
4 correction was used for comparing every mean to a control mean, on normally  
5 distributed populations following two-way ANOVA.

6

## 7 **Acknowledgements**

8 We thank the University of Sheffield aquarium staff for the excellent care of fish stocks. We  
9 are grateful to Rosemary Kim, Helen Eachus, Emily Noël, Chris Derrick, Jack Paveley and  
10 Dheemanth Subramanya for useful discussions contributing to this study and for  
11 sharing chemical compounds. We also thank Elisabeth Kugler for her technical support  
12 for image analysis. This work was supported by a University of Sheffield, Biomedical  
13 Science department studentship awarded by DM and by two BBRSC grants to FVE  
14 (BB/R015457/1; BB/M02332X/1). N.K was funded by the Deutsche Forschungs grant  
15 (KR3363/3-1). We finally thank the reviewers for their positive comments and their  
16 constructive ideas.

17

## 18 **Author contributions**

19 Financial support: BB/R015457/1; BB/M02332X/1, TUoS; Investigation, validation and  
20 data curation: DM, FVE; Formal visualization and analysis: DM; Resources: FVE, EM, KS,  
21 NL, HE, VTC, NK; Project Administration: DM, FVE; Writing-Original Draft: DM and FVE;  
22 Writing -Review and Editing: all authors contributed equally.

23

## 24 **Conflict of interest**

25 The authors declare that they have no conflict of interest.



## 1   **References**

- 2       1. Alsop, D. and Vijayan, M. (2009) 'The zebrafish stress axis: Molecular fallout from  
3       the teleost-specific genome duplication event', *General and Comparative*  
4       *Endocrinology*. Elsevier Inc., 161(1), pp. 62–66. doi:  
5       10.1016/j.ygcen.2008.09.011.
- 6       2. Alsop, D. and Vijayan, M. M. (2008) 'Development of the corticosteroid stress axis  
7       and receptor expression in zebrafish.', *American journal of physiology.*  
8       *Regulatory, integrative and comparative physiology*, 294(3), pp. R711–R719. doi:  
9       10.1152/ajpregu.00671.2007.
- 10      3. Baker, M. E. and Katsu, Y. (2017) '30 YEARS OF THE MINERALOCORTICOID  
11      RECEPTOR: Evolution of the mineralocorticoid receptor: sequence, structure and  
12      function', *Journal of Endocrinology*. Bristol, UK: Bioscientifica Ltd, 234(1), pp. T1–  
13      T16. doi: 10.1530/JOE-16-0661.
- 14      4. Bamberger, C. M., Schulte, H. M. and Chrousos, G. P. (1996) 'Molecular  
15      Determinants of Glucocorticoid Receptor Function and Tissue Sensitivity to  
16      Glucocorticoids', *Endocrine Reviews*, 17(3), pp. 245–261. doi: 10.1210/edrv-17-  
17      3-245.
- 18      5. Barnes, P. J. (2011) 'Glucocorticosteroids: current and future directions', *British*  
19      *Journal of Pharmacology*. John Wiley & Sons, Ltd (10.1111), 163(1), pp. 29–43.  
20      doi: 10.1111/j.1476-5381.2010.01199.x.
- 21      6. Barnes, P. J. and Adcock, I. M. (2009) 'Glucocorticoid resistance in inflammatory  
22      diseases', *The Lancet*. Elsevier, 373(9678), pp. 1905–1917. doi: 10.1016/S0140-  
23      6736(09)60326-3.
- 24      7. Berra, E. *et al.* (2001) 'Hypoxia-inducible factor-1 $\alpha$  (HIF-1 $\alpha$ ) escapes O<sub>2</sub>-driven  
25      proteasomal degradation irrespective of its subcellular localization: nucleus or  
26      cytoplasm', *EMBO reports*, 2(7), pp. 615–620. doi: 10.1093/embo-  
27      reports/kve130.
- 28      8. Bertout, J. A., Patel, S. A. and Simon, M. C. (2008) 'The impact of O<sub>2</sub> availability on  
29      human cancer.', *Nature reviews. Cancer*, 8(12), pp. 967–75. doi:  
30      10.1038/nrc2540.
- 31      9. Burger, A. *et al.* (2016) 'Maximizing mutagenesis with solubilized CRISPR-Cas9  
32      ribonucleoprotein complexes', *Development*, 143(11), pp. 2025 LP – 2037. doi:  
33      10.1242/dev.134809.

- 1 10. Busillo, J. M. and Cidlowski, J. A. (2013) 'The five Rs of glucocorticoid action  
2 during inflammation: Ready, reinforce, repress, resolve, and restore', *Trends in*  
3 *Endocrinology and Metabolism*. doi: 10.1016/j.tem.2012.11.005.
- 4 11. Chatzopoulou, A. *et al.* (2015) 'Transcriptional and metabolic effects of  
5 glucocorticoid receptor  $\alpha$  and  $\beta$  signaling in zebrafish', *Endocrinology*, 156(5), pp.  
6 1757–1769. doi: 10.1210/en.2014-1941.
- 7 12. Chatzopoulou, A. *et al.* (2017) 'Functional analysis reveals no transcriptional role  
8 for the glucocorticoid receptor  $\beta$ -isoform in zebrafish', *Molecular and Cellular*  
9 *Endocrinology*, 447. doi: 10.1016/j.mce.2017.02.036.
- 10 13. Cruz, S. A. *et al.* (2013) 'Glucocorticoid Receptor, but Not Mineralocorticoid  
11 Receptor, Mediates Cortisol Regulation of Epidermal Ionocyte Development and  
12 Ion Transport in Zebrafish (*Danio Rerio*)', *PLOS ONE*. Public Library of Science,  
13 8(10), p. e77997. Available at: <https://doi.org/10.1371/journal.pone.0077997>.
- 14 14. Cummins, E. P. and Taylor, C. T. (2005) 'Hypoxia-responsive transcription  
15 factors', *Pflugers Archiv European Journal of Physiology*, 450(6), pp. 363–371. doi:  
16 10.1007/s00424-005-1413-7.
- 17 15. Dittrich, A. *et al.* (2012) 'Glucocorticoids increase interleukin-6-dependent gene  
18 induction by interfering with the expression of the suppressor of cytokine  
19 signaling 3 feedback inhibitor', *Hepatology*. John Wiley & Sons, Ltd, 55(1), pp.  
20 256–266. doi: 10.1002/hep.24655.
- 21 16. Dougherty, E. J. and Pollenz, R. S. (2010) 'ARNT: A Key bHLH/PAS Regulatory  
22 Protein Across Multiple Pathways', *Comprehensive Toxicology*. Elsevier, pp. 231–  
23 252. doi: 10.1016/B978-0-08-046884-6.00214-1.
- 24 17. Eachus, H. *et al.* (2017) 'Genetic disruption of 21-hydroxylase in zebrafish causes  
25 interrenal hyperplasia', *Endocrinology*, 158(12), pp. 4165–4173. doi:  
26 10.1210/en.2017-00549.
- 27 18. Elks, P. M. *et al.* (2015) 'Exploring the HIFs, buts and maybes of hypoxia  
28 signalling in disease: lessons from zebrafish models', *Disease Models &*  
29 *Mechanisms*, 8(11), pp. 1349–1360. doi: 10.1242/dmm.021865.
- 30 19. Eltzschig, H. K. and Carmeliet, P. (2011) 'Hypoxia and Inflammation', *The New*  
31 *England journal of medicine*. NIH Public Access, 364(7), p. 656. doi:  
32 10.1056/NEJMRA0910283.
- 33 20. Facchinello, N. *et al.* (2017) 'nr3c1 null mutant zebrafish are viable and reveal  
34 DNA-binding-independent activities of the glucocorticoid receptor', *Scientific*

- 1           *Reports*. London: Nature Publishing Group UK, 7, p. 4371. doi: 10.1038/s41598-  
2           017-04535-6.
- 3           21. Faught, E. and Vijayan, M. M. (2018) 'The mineralocorticoid receptor is essential  
4           for stress axis regulation in zebrafish larvae', *Scientific Reports*. Springer US, 8(1),  
5           pp. 1–11. doi: 10.1038/s41598-018-36681-w.
- 6           22. Fromage, G. (2012) 'Steroids: what are they and what is their mechanism of  
7           action?', *Journal of Aesthetic Nursing*. Mark Allen Group, 1(4), pp. 198–201. doi:  
8           10.12968/joan.2012.1.4.198.
- 9           23. Gaber, T. *et al.* (2011) 'Macrophage Migration Inhibitory Factor Counterregulates  
10           Dexamethasone-Mediated Suppression of Hypoxia-Inducible Factor-1 $\alpha$  Function  
11           and Differentially Influences Human CD4<sup>+</sup> T Cell  
12           Proliferation under Hypoxia', *The Journal of Immunology*, 186(2), pp. 764 LP –  
13           774. doi: 10.4049/jimmunol.0903421.
- 14           24. Griffiths, B. B. *et al.* (2012) 'A zebrafish model of glucocorticoid resistance shows  
15           serotonergic modulation of the stress response.', *Frontiers in behavioral  
16           neuroscience*, 6(October), p. 68. doi: 10.3389/fnbeh.2012.00068.
- 17           25. Hatamoto, K. and Shingyoji, C. (2008) 'Cyclical training enhances the  
18           melanophore responses of zebrafish to background colours', *Pigment Cell &  
19           Melanoma Research*. John Wiley & Sons, Ltd (10.1111), 21(3), pp. 397–406. doi:  
20           10.1111/j.1755-148X.2008.00445.x.
- 21           26. Hill, A. J. *et al.* (2009) 'Potential Roles of Arnt2 in Zebrafish Larval Development',  
22           *Zebrafish*. 140 Huguenot Street, 3rd Floor New Rochelle, NY 10801 USA: Mary Ann  
23           Liebert, Inc., 6(1), pp. 79–91. doi: 10.1089/zeb.2008.0536.
- 24           27. Hruscha, A. *et al.* (2013) 'Efficient CRISPR/Cas9 genome editing with low off-  
25           target effects in zebrafish', *Development*, 140(May), pp. 4982–4987. doi:  
26           10.1242/dev.099085.
- 27           28. Imtiyaz, H. Z. and Simon, M. C. (2010) 'Hypoxia-inducible factors as essential  
28           regulators of inflammation', *Current topics in microbiology and immunology*, 345,  
29           pp. 105–120. doi: 10.1007/82\_2010\_74.
- 30           29. Kimmel, C. B. *et al.* (1995) 'Stages of Embryonic Development of the Zebrafish',  
31           *Developmental Dynamics*, 203, pp. 253–310. doi: 10.1002/aja.1002030302.
- 32           30. Köblitz, L. *et al.* (2015) 'Developmental Expression and Hypoxic Induction of  
33           Hypoxia Inducible Transcription Factors in the Zebrafish.', *PloS one*, 10(6), p.  
34           e0128938. doi: 10.1371/journal.pone.0128938.

- 1 31. Kodama, T. *et al.* (2003) 'Role of the glucocorticoid receptor for regulation of  
2 hypoxia-dependent gene expression', *Journal of Biological Chemistry*, 278(35),  
3 pp. 33384–33391. doi: 10.1074/jbc.M302581200.
- 4 32. Kramer, B. M. R. *et al.* (2001) 'Dynamics and plasticity of peptidergic control  
5 centres in the retino-brain-pituitary system of *Xenopus laevis*', *Microscopy*  
6 *Research and Technique*. John Wiley & Sons, Ltd, 54(3), pp. 188–199. doi:  
7 10.1002/jemt.1132.
- 8 33. Kurrasch, D. M. *et al.* (2009) 'Neuroendocrine transcriptional programs adapt  
9 dynamically to the supply and demand for neuropeptides as revealed in NSF  
10 mutant zebrafish', *Neural development*. BioMed Central, 4, p. 22. doi:  
11 10.1186/1749-8104-4-22.
- 12 34. Labun, K. *et al.* (2016) 'CHOPCHOP v2: a web tool for the next generation of  
13 CRISPR genome engineering', *Nucleic Acids Research*, 44(W1), pp. W272–W276.  
14 doi: 10.1093/nar/gkw398.
- 15 35. Langlais, D. *et al.* (2008) 'Regulatory Network Analyses Reveal Genome-Wide  
16 Potentiation of LIF Signaling by Glucocorticoids and Define an Innate Cell  
17 Defense Response', *PLOS Genetics*. Public Library of Science, 4(10), p. e1000224.  
18 Available at: <https://doi.org/10.1371/journal.pgen.1000224>.
- 19 36. Langlais, D. *et al.* (2012) 'The Stat3/GR Interaction Code: Predictive Value of  
20 Direct/Indirect DNA Recruitment for Transcription Outcome', *Molecular Cell*. Cell  
21 Press, 47(1), pp. 38–49. doi: 10.1016/J.MOLCEL.2012.04.021.
- 22 37. Lee, H. B. *et al.* (2019) 'Novel zebrafish behavioral assay to identify modifiers of  
23 the rapid, nongenomic stress response', *Genes, brain, and behavior*. 2019/01/15.  
24 Blackwell Publishing Ltd, 18(2), pp. e12549–e12549. doi: 10.1111/gbb.12549.
- 25 38. Leonard, M. O. *et al.* (2005) 'Potentiation of Glucocorticoid Activity in Hypoxia  
26 through Induction of the Glucocorticoid Receptor', *The Journal of Immunology*,  
27 174, pp. 2250–2257. doi: 10.4049/jimmunol.174.4.2250.
- 28 39. Livak, K. J. and Schmittgen, T. D. (2001) 'Analysis of Relative Gene Expression  
29 Data Using Real-Time Quantitative PCR and the 2- $\Delta\Delta$ CT Method', *Methods*.  
30 Academic Press, 25(4), pp. 402–408. doi: 10.1006/METH.2001.1262.
- 31 40. Mitre-Aguilar, I. B., Cabrera-Quintero, A. J. and Zentella-Dehesa, A. (2015)  
32 'Genomic and non-genomic effects of glucocorticoids: implications for breast  
33 cancer', *International journal of clinical and experimental pathology*. e-Century  
34 Publishing Corporation, 8(1), pp. 1–10. Available at:

- 1 <https://www.ncbi.nlm.nih.gov/pubmed/25755688>.
- 2 41. Moghadam-Kia, S. and Werth, V. P. (2010) 'Prevention and treatment of systemic  
3 glucocorticoid side effects', *International Journal of Dermatology*. John Wiley &  
4 Sons, Ltd (10.1111), 49(3), pp. 239–248. doi: 10.1111/j.1365-  
5 4632.2009.04322.x.
- 6 42. Montague, T. G. *et al.* (2014) 'CHOPCHOP: a CRISPR/Cas9 and TALEN web tool  
7 for genome editing', *Nucleic acids research*. 2014/05/26. Oxford University Press,  
8 42(Web Server issue), pp. W401–W407. doi: 10.1093/nar/gku410.
- 9 43. Montgomery, M. T. *et al.* (1990) 'The use of glucocorticosteroids to lessen the  
10 inflammatory sequelae following third molar surgery', *Journal of Oral and*  
11 *Maxillofacial Surgery*. W.B. Saunders, 48(2), pp. 179–187. doi: 10.1016/S0278-  
12 2391(10)80207-1.
- 13 44. Moroz, E. *et al.* (2009) 'Real-Time Imaging of HIF-1 $\alpha$  Stabilization and  
14 Degradation', *PLOS ONE*. Public Library of Science, 4(4), p. e5077. Available at:  
15 <https://doi.org/10.1371/journal.pone.0005077>.
- 16 45. Muthu, V. *et al.* (2016) 'Rx3 and Shh direct anisotropic growth and specification  
17 in the zebrafish tuberal/anterior hypothalamus', *Development*, 143(14), pp. 2651  
18 LP – 2663. doi: 10.1242/dev.138305.
- 19 46. Muto, A. *et al.* (2005) 'Forward Genetic Analysis of Visual Behavior in Zebrafish',  
20 *PLOS Genetics*. Public Library of Science, 1(5), p. e66. Available at:  
21 <https://doi.org/10.1371/journal.pgen.0010066>.
- 22 47. Muto, A. *et al.* (2013) 'Glucocorticoid receptor activity regulates light adaptation  
23 in the zebrafish retina.', *Frontiers in neural circuits*, 7(September), p. 145. doi:  
24 10.3389/fncir.2013.00145.
- 25 48. Neeck, G., Renkawitz, R. and Eggert, M. (2002) 'Molecular aspects of  
26 glucocorticoid hormone action in rheumatoid arthritis', *Cytokines, Cellular &*  
27 *Molecular Therapy*, 7(2), pp. 61–69. doi: 10.1080/13684730412331302081.
- 28 49. Nikolaus, S., Fölsch, U. and Schreiber, S. (2000) *Immunopharmacology of 5-*  
29 *aminosalicylic acid and of glucocorticoids in the therapy of inflammatory bowel*  
30 *disease, Hepato-gastroenterology*.
- 31 50. Oakley, R. H. and Cidlowski, J. A. (2013) 'The biology of the glucocorticoid  
32 receptor: New signaling mechanisms in health and disease', *Journal of Allergy*  
33 *and Clinical Immunology*, 132(5). doi: 10.1016/j.jaci.2013.09.007.
- 34 51. Palazon, A. *et al.* (2014) 'HIF transcription factors, inflammation, and immunity',

- 1           *Immunity*, 41(4), pp. 518–528. doi: 10.1016/j.immuni.2014.09.008.
- 2       52. Panettieri, R. A. *et al.* (2019) ‘Non-genomic Effects of Glucocorticoids: An
- 3           Updated View’, *Trends in Pharmacological Sciences*. doi:
- 4           10.1016/j.tips.2018.11.002.
- 5       53. Pelster, B. and Egg, M. (2018) ‘Hypoxia-inducible transcription factors in fish:
- 6           expression, function and interconnection with the circadian clock’, *The Journal of*
- 7           *Experimental Biology*, 221(13), p. jeb163709. doi: 10.1242/jeb.163709.
- 8       54. Pescador, N. *et al.* (2005) ‘Identification of a functional hypoxia-responsive
- 9           element that regulates the expression of the egl nine homologue 3 (egln3/phd3)
- 10          gene’, *The Biochemical journal*. Portland Press Ltd., 390(Pt 1), pp. 189–197. doi:
- 11          10.1042/BJ20042121.
- 12       55. Prash, A. L. *et al.* (2006) ‘Identification of Zebrafish ARNT1 Homologs: 2,3,7,8-
- 13          Tetrachlorodibenzo-*em*&gt;p&lt;/em>-dioxin Toxicity in the Developing
- 14          Zebrafish Requires ARNT1’, *Molecular Pharmacology*, 69(3), pp. 776 LP – 787.
- 15          doi: 10.1124/mol.105.016873.
- 16       56. Ramamoorthy, S. and Cidowski, J. A. (2016) ‘Corticosteroids. Mechanisms of
- 17          Action in Health and Disease’, *Rheumatic Disease Clinics of North America*. doi:
- 18          10.1016/j.rdc.2015.08.002.
- 19       57. van Rooijen, E. *et al.* (2009) ‘Zebrafish mutants in the von Hippel-Lindau tumor
- 20          suppressor display a hypoxic response and recapitulate key aspects of Chuvash
- 21          polycythemia’, *Blood*, 113(25), pp. 6449 LP – 6460. doi: 10.1182/blood-2008-07-
- 22          167890.
- 23       58. van Rooijen, E. *et al.* (2011) ‘A Zebrafish Model for VHL and Hypoxia Signaling’,
- 24          *Methods in Cell Biology*, 105(December 2011), pp. 163–190. doi: 10.1016/B978-
- 25          0-12-381320-6.00007-2.
- 26       59. Santhakumar, K. *et al.* (2012) ‘A zebrafish model to study and therapeutically
- 27          manipulate hypoxia signaling in tumorigenesis’, *Cancer Research*, 72(16), pp.
- 28          4017–4027. doi: 10.1158/0008-5472.CAN-11-3148.
- 29       60. Schaaf, M. J. M., Chatzopoulou, A. and Spaink, H. P. (2009) ‘The zebrafish as a
- 30          model system for glucocorticoid receptor research’, *Comparative Biochemistry*
- 31          *and Physiology - A Molecular and Integrative Physiology*. Elsevier Inc., 153(1), pp.
- 32          75–82. doi: 10.1016/j.cbpa.2008.12.014.
- 33       61. Semenza, G. L. (2011) ‘Oxygen Sensing, Homeostasis, and Disease’, *New England*
- 34          *Journal of Medicine*. Massachusetts Medical Society, 365(6), pp. 537–547. doi:

- 1           10.1056/NEJMra1011165.
- 2           62. Semenza, G. L. (2012) 'Hypoxia-inducible factors in physiology and medicine',  
3           *Cell*, 148(3), pp. 399–408. doi: 10.1016/j.cell.2012.01.021.
- 4           63. Semenza, G. L. (2013) 'HIF-1 mediates metabolic responses to intratumoral  
5           hypoxia and oncogenic mutations', *Journal of Clinical Investigation*, 123(9), pp.  
6           3664–3671. doi: 10.1172/JCI67230.
- 7           64. Stahn, C. and Buttgerit, F. (2008) 'Genomic and nongenomic effects of  
8           glucocorticoids', *Nature Clinical Practice Rheumatology*. Nature Publishing Group,  
9           4, p. 525. Available at: <https://doi.org/10.1038/ncprheum0898>.
- 10          65. Tan, T. *et al.* (2017) 'Overexpression and Knockdown of Hypoxia-Inducible  
11          Factor 1 Disrupt the Expression of Steroidogenic Enzyme Genes and Early  
12          Embryonic Development in Zebrafish', *Gene regulation and systems biology*. SAGE  
13          Publications, 11, pp. 1177625017713193–1177625017713193. doi:  
14          10.1177/1177625017713193.
- 15          66. Thisse, C. and Thisse, B. (2008) 'High-resolution in situ hybridization to whole-  
16          mount zebrafish embryos', *Nature Protocols*. Nature Publishing Group, 3, p. 59.  
17          Available at: <https://doi.org/10.1038/nprot.2007.514>.
- 18          67. Tokarz, J. *et al.* (2013) 'Zebrafish and steroids: What do we know and what do we  
19          need to know?', *Journal of Steroid Biochemistry and Molecular Biology*. doi:  
20          10.1016/j.jsbmb.2013.01.003.
- 21          68. Vettori, A. *et al.* (2017) 'Glucocorticoids promote Von Hippel Lindau degradation  
22          and Hif-1 $\alpha$  stabilization', *Proceedings of the National Academy of Sciences*, p.  
23          201705338. doi: 10.1073/pnas.1705338114.
- 24          69. Wagner, A. E. *et al.* (2008) 'Dexamethasone impairs hypoxia-inducible factor-1  
25          function', *Biochemical and Biophysical Research Communications*, 372(2), pp.  
26          336–340. doi: 10.1016/j.bbrc.2008.05.061.
- 27          70. Wang, W. D. *et al.* (2000) 'Overexpression of a Zebrafish ARNT2-like Factor  
28          Represses CYP1A Transcription in ZLE Cells', *Marine biotechnology (New York,*  
29          *N.Y.)*, 2(4), p. 376—386. Available at:  
30          <http://europepmc.org/abstract/MED/10960127>.
- 31          71. Weger, B. D. *et al.* (2016) 'Extensive Regulation of Diurnal Transcription and  
32          Metabolism by Glucocorticoids', *PLOS Genetics*. Public Library of Science, 12(12),  
33          p. e1006512. Available at: <https://doi.org/10.1371/journal.pgen.1006512>.
- 34          72. Weger, M. *et al.* (2018) 'Expression and activity profiling of the steroidogenic

- 1 enzymes of glucocorticoid biosynthesis and the fdx1 co-factors in zebrafish',  
2 *Journal of Neuroendocrinology*, 30(4), pp. 1–15. doi: 10.1111/jne.12586.
- 3 73. Wu, R. S. *et al.* (2018) 'A Rapid Method for Directed Gene Knockout for Screening  
4 in G0 Zebrafish', *Developmental Cell*. Elsevier Inc., 46(1), pp. 112-125.e4. doi:  
5 10.1016/j.devcel.2018.06.003.
- 6 74. Xie, Y. *et al.* (2019) 'Glucocorticoids inhibit macrophage differentiation towards a  
7 pro-inflammatory phenotype upon wounding without affecting their migration',  
8 *bioRxiv*, p. 473926. doi: 10.1101/473926.
- 9 75. Zhang, C. *et al.* (2015) 'Effects of hypoxia inducible factor-1 $\alpha$  on apoptotic  
10 inhibition and glucocorticoid receptor downregulation by dexamethasone in  
11 AtT-20 cells', *BMC Endocrine Disorders*. BMC Endocrine Disorders, 15(24), pp. 1–  
12 9. doi: 10.1186/s12902-015-0017-2.
- 13 76. Zhang, H. *et al.* (2011) 'Hypoxia-Inducible Factor Directs POMC Gene to Mediate  
14 Hypothalamic Glucose Sensing and Energy Balance Regulation', *PLoS Biology*.  
15 Public Library of Science, 9(7), p. e1001112. Available at:  
16 <https://doi.org/10.1371/journal.pbio.1001112>.
- 17 77. Zhang, P. *et al.* (2016) 'Down-regulation of GR?? expression and inhibition of its  
18 nuclear translocation by hypoxia', *Life Sciences*, 146, pp. 92–99. doi:  
19 10.1016/j.lfs.2015.12.059.
- 20 78. Ziv, L. *et al.* (2012) 'An affective disorder in zebrafish with mutation of the  
21 glucocorticoid receptor', *Molecular Psychiatry*. Nature Publishing Group, 18(6),  
22 pp. 681–691. doi: 10.1038/mp.2012.64.
- 23  
24



1 **Fig 1. *arnt1* and *arnt2* have partially overlapping functions and synergistically contribute**  
2 **to HIF signalling.**

3 A. Schematic representation of zebrafish *hif1 $\beta$*  (*arnt1*) gene. Exons are shown as black boxes,  
4 whereas introns as lines. The red arrowhead shows the position of a +7 bp insertion in exon 5  
5 (encoding the bHLH DNA binding domain). In the *arnt1* wt and mutant sequence. CRISPR target  
6 site: bold. Protospacer-adjacent-motif (PAM) sequence: red.

7 B-B'. Magnified picture of a representative 5 dpf *vhl*<sup>-/-</sup> larva compared to 5dpf *arnt1*<sup>-/-</sup>;*vhl*<sup>-/-</sup> (C-  
8 C'). Among the 120 GFP<sup>+</sup> embryos derived from *arnt1*<sup>+/-</sup>;*vhl*<sup>+/-</sup>(*phd3:eGFP*) x *arnt1*<sup>-/-</sup>;*vhl*<sup>+/-</sup>  
9 (*phd3:eGFP*), 15 larvae were characterized by the absence of pericardial oedema, no ectopic  
10 extra vasculature at the level of the tail, no bright liver and a reduced brightness in the rest of  
11 the body (black and white arrowheads). Genotyping post phenotypic analysis on sorted larvae  
12 confirmed genotype-phenotype correlation. Fluorescence, exposure = 2 seconds. Scale bar 200  
13  $\mu$ m.

14 D-G. Representative picture of phenotypic analysis performed on DMSO and BME [30  $\mu$ M]  
15 treated 5 dpf larvae, derived from *arnt1*<sup>+/-</sup>;*vhl*<sup>+/-</sup>(*phd3:eGFP*) x *arnt1*<sup>-/-</sup>;*vhl*<sup>+/-</sup>(*phd3:eGFP*) (n=540).  
16 All the genotype combinations observed are represented in the figure. Among the 405 GFP<sup>+</sup>  
17 larvae, all the 25 *arnt1*<sup>-/-</sup>;*vhl*<sup>-/-</sup> showed the aforementioned partially rescued *vhl* phenotype (D).  
18 Fluorescence, exposure = 2 seconds. Scale bar 500  $\mu$ m.

19 H-J. Representative pictures of 5 dpf CRISPANT mutants created by redundantly targeting *arnt2*  
20 gene via co-injection of 4x gRNAs in *arnt1*<sup>+/-</sup>;*vhl*<sup>+/-</sup>(*phd3:eGFP*) x *arnt1*<sup>-/-</sup>;*vhl*<sup>+/-</sup>(*phd3:eGFP*)  
21 derived embryos (n=300). Uninjected embryos were used as control (n=120). White asterisks:  
22 head, liver and tail regions. Fluorescence, exposure = 991,4 ms. Scale bar 500  $\mu$ m.

23 K. Statistical analysis performed on mean grey values quantification (at the level of the head,  
24 liver and tail), after phenotypic analysis on 5 dpf *arnt2* 4x gRNAs injected and uninjected larvae.  
25 *vhl*<sup>-/-</sup> uninjected n = 8 larvae: head 93.1  $\pm$  2.33 (mean  $\pm$  s.e.m); liver 99.65  $\pm$  3.49 (mean  $\pm$  s.e.m);  
26 tail 29.58  $\pm$  0.73 (mean  $\pm$  s.e.m). *arnt1*<sup>-/-</sup>;*vhl*<sup>-/-</sup> uninjected n = 10 larvae: head 56.49  $\pm$  3.36 (mean  
27  $\pm$  s.e.m); liver 24,7  $\pm$  2.36 (mean  $\pm$  s.e.m); tail 12.39  $\pm$  0,75 (mean  $\pm$  s.e.m). *vhl*<sup>-/-</sup> injected n = 12  
28 larvae: head 43.69  $\pm$  3.25 (mean  $\pm$  s.e.m); liver 45.54  $\pm$  4.57 (mean  $\pm$  s.e.m); tail 16.09  $\pm$  1.37  
29 (mean  $\pm$  s.e.m). *arnt1*<sup>-/-</sup>;*vhl*<sup>-/-</sup> injected n = 11 larvae: head 24.66  $\pm$  1.63 (mean  $\pm$  s.e.m); liver  
30 13.88  $\pm$  0.66 (mean  $\pm$  s.e.m); tail 5.16  $\pm$  0.33 (mean  $\pm$  s.e.m). Ordinary One-way ANOVA followed  
31 by Sidak's multiple comparison test (\*P < 0.05; \*\*P < 0.01; \*\*\*P < 0.001; \*\*\*\*P < 0.0001).

32  
33

1 **Fig 2. HIF signalling inversely correlate with GC transcriptional activity and cortisol**  
2 **biosynthesis.**

3 A. Schematic view of RTqPCR analysis on *fkbp5* expression performed on the *vhl*<sup>-/-</sup>(*phd3:eGFP*)  
4 and the *arnt1*<sup>-/-</sup>(*phd3:eGFP*) mutant lines at 5 dpf. Upregulated (in *vhl*<sup>-/-</sup>) HIF signalling  
5 repressed Gr activity, whereas *arnt1* loss of function derepressed it. Statistical analysis was  
6 performed on  $\Delta\Delta$ Ct values, whereas data are shown as fold change values for RTqPCR analysed  
7 samples; ordinary Two-way ANOVA followed by Dunnett's multiple comparison test (\*P < 0.05;  
8 \*\*P < 0.01; \*\*\*P < 0.001; \*\*\*\*P < 0.0001).

9 B-C'. Representative pictures of WISH performed on DMSO and BME [30  $\mu$ M] treated *arnt1*  
10 mutant line, at 5 dpf, using *pomca* as probe. *arnt1* wt DMSO treated (n= 30/30 larvae) showed  
11 normal *pomca* expression; *arnt1* wt BME treated (n= 29/30 larvae) showed downregulated  
12 *pomca* expression. In contrast, *arnt1*<sup>-/-</sup> DMSO treated (n= 28/30) and *arnt1*<sup>-/-</sup> BME treated (n=  
13 30/30) larvae showed downregulated *pomca* expression. Chi-square test (\*\*\*\*P < 0.0001). Scale  
14 bar 50  $\mu$ m.

15 D-E'. Representative pictures of WISH performed on DMSO and BME [30  $\mu$ M] treated *vhl*  
16 mutant line, at 5 dpf, using *pomca* as probe. DMSO treated *vhl* siblings (n= 26/28) showed  
17 normal *pomca* expression; BME treated *vhl* siblings (n= 28/30) showed downregulated *pomca*  
18 expression. In contrast, *vhl*<sup>-/-</sup> DMSO (n= 28/29) and BME (n= 28/28) treated larvae showed  
19 downregulated *pomca* expression. Chi-square test (\*\*\*\*P < 0.0001). Scale bar 50  $\mu$ m.  
20

21 F-F'. Steroid quantification results showed a significantly reduced cortisol concentration (P  
22 value <0;0028) in *vhl* mutants (92.7 fg/larva, in triplicate), compared to *vhl* siblings (321  
23 fg/larva, in triplicate) at 5 dpf (F). Moreover, a significantly increased cortisol concentration (P  
24 value <0;0001) was measured in *arnt1* mutants (487.5 fg/larva, in triplicate), compared to  
25 *arnt1* wild-types (325 fg/larva, in triplicate) at 5 dpf (F'); unpaired t-test (\*\*P < 0.01; \*\*\*P  
26 <0.001).  
27

28 G. **DMSO**: Speculative scheme of how the putative HIF-GC crosstalk occur in wildtypes and how  
29 it is affected both in *arnt1*<sup>-/-</sup> and in *vhl*<sup>-/-</sup> larvae at 5 dpf. In wildtype scenario HIF signalling helps  
30 the GC-GR negative feedback to protect the body from an uncontrolled stress response. In  
31 particular, we speculate that HIF transcriptional activity is able to inhibit *pomca* expression  
32 when cortisol levels arise over a certain threshold in order to maintain both HIF and GC basal  
33 levels. However, in *arnt1*<sup>-/-</sup> scenario, the HIF-mediated negative feedback is compromised by the  
34 lack of a functional Arnt1. This triggers an initial uncontrolled *pomca* expression, which  
35 increases cortisol levels and subsequently downregulate *pomca* expression itself. Vicersa, in *vhl*  
36 <sup>-/-</sup> scenario, the HIF-mediated negative feedback can exert a stronger inhibition of *pomca* due to  
37 the presence of upregulated HIF signalling. This results both in downregulated cortisol levels  
38 and in a suppressed GR responsiveness. However, the presence of alternative mechanisms  
39 cannot be completely excluded (i.e HIF might interact more directly with GC/GR to impair its  
40 function). Finally, the combination high cortisol/low *pomca* is very rare and this combination  
41 may change over the course of development.  
42

43 G. **BME**: Speculative scheme of how the putative HIF-GC crosstalk occur in wildtypes and how it  
44 is affected both in *arnt1*<sup>-/-</sup> and in *vhl*<sup>-/-</sup> larvae at 5 dpf, after BME[30 $\mu$ M] treatment. In all the  
45 cases, because of betamethasone acts downstream of the HPI axis, by binding directly to Gr, it is  
46 able to upregulate glucocorticoid target genes expression. Consequently, since GC are able to  
47 stimulate HIF signalling, as expected, we observed an increase *phd3:eGFP*-related brightness  
48 both in wildtypes and in *vhl*<sup>-/-</sup>. However, the fact that we did not observed any HIF upregulation  
49 both in *arnt1*<sup>-/-</sup> and in *arnt1*<sup>-/-</sup>;*vhl*<sup>-/-</sup>, highlighted the fact that the BME-induced HIF signalling  
50 activation is an Arnt1 dependent mechanism.  
51  
52

1 **Fig 3. *gr* mutation partially rescues *vhl* phenotype.**

2 A. Schematic representation of zebrafish *gr* (*nr3c1*) gene. Exons are shown as boxes, introns as  
3 lines. The red arrowhead shows the position of a -11 bp deletion in exon 3 (encoding the DNA  
4 binding domain). *gr* wt and mutant sequence. CRISPR target site: bold. PAM sequence: red.

5 B-C'. Representative pictures of WISH performed on DMSO and BME [30  $\mu$ M] treated *gr* mutant  
6 line, at 5 dpf, using *pomca* as probe. Scale bar 100  $\mu$ m. *gr* siblings DMSO treated (n= 30/30  
7 larvae) showed normal expression; *gr* siblings (n= 29/30 larvae) showed downregulated *pomca*  
8 expression after BME treatment. Both DMSO treated (n= 30/30) and BME treated (n= 30/30)  
9 *gr*<sup>-/-</sup> larvae showed upregulated *pomca* expression.

10 D. RTqPCR analysis performed on *gr* wt (n=10; 3 repeats) and *gr*<sup>-/-</sup> (n=10; 3 repeats) larvae at 5  
11 dpf, using *fkbp5* as probe. Statistical analysis was performed on  $\Delta\Delta$ Ct values, whereas data are  
12 shown as fold change values. Ordinary Two-way ANOVA followed by Dunnett's multiple  
13 comparison test (\*\*\*\*P < 0.0001).

14 E-G. Magnified picture of representative *gr*<sup>-/-</sup>; *vhl*<sup>-/-</sup> larvae compared to *arnt1*<sup>-/-</sup>; *vhl*<sup>-/-</sup> and *vhl*<sup>-/-</sup>  
15 larvae. Both double mutants are characterized by the absence of pericardial oedema, no ectopic  
16 extra vasculature at the level of the tail, no bright liver and a reduced brightness in the rest of  
17 the body (white and black arrowheads), compared to *vhl*<sup>-/-</sup> larvae. Fluorescence, exposure = 2  
18 seconds. Scale bar 200  $\mu$ m.

19 H. RTqPCR analysis performed both on HIF and GC target genes expression carried out on *gr*<sup>-/-</sup>;  
20 *vhl*<sup>-/-</sup> and sibling at 5 dpf, (n=10 larvae, per group, in triplicate) compared to *arnt1*<sup>-/-</sup>; *vhl*<sup>-/-</sup> larvae  
21 and siblings, at 5dpd (n=10 larvae, per group, in triplicate). Both *vegfab* and *egln3* are HIF target  
22 genes, whereas *fkbp5* is a GC target gene. Statistical analysis was performed on  $\Delta\Delta$ Ct values,  
23 whereas data are shown as fold change values, Ordinary Two-way ANOVA followed by  
24 Dunnett's multiple comparison test.

25 I-L. Representative picture of phenotypic analysis performed on DMSO and BME [30  $\mu$ M]  
26 treated *gr*<sup>+/-</sup>; *vhl*<sup>+/-</sup>(*phd3::EGFP*) incross-derived 5 dpf larvae (n=600). All the genotype  
27 combinations observed are represented in the figure. Among the 450 GFP<sup>+</sup> larvae analysed, 28  
28 showed a partially rescued *vhl* phenotype which resembled the *arnt1*'s one. Three experimental  
29 repeats. In all panels: \*P < 0.05; \*\*P < 0.01; \*\*\*P < 0.001; \*\*\*\*P < 0.0001. Fluorescence, exposure  
30 = 2 seconds. Scale bar 500  $\mu$ m.

31  
32

33 **Fig 4. *gr* loss of function effect is stronger when HIF-signalling is moderately upregulated.**

34 A-E. Representative picture of the main differences between *vhl*<sup>-/-</sup>, *arnt1*<sup>-/-</sup>; *vhl*<sup>-/-</sup>, *gr*<sup>-/-</sup>; *vhl*<sup>-/-</sup> and  
35 triple *gr*<sup>-/-</sup>; *arnt1*<sup>-/-</sup>; *vhl*<sup>-/-</sup> larvae at 5 dpf. Among the 488 *phd3::eGFP* expressing larvae analysed, 7  
36 larvae were characterized by the absence of pericardial oedema (black arrowheads, left), no  
37 ectopic extra vasculature at the level of the tail (black arrowheads, right), no visible *phd3::EGFP*  
38 HIF reporter in the liver (white arrowheads, left) and even more reduced levels of this marker  
39 in the head and in the rest of the body (white arrowheads, right). Genotypic analysis allowed to  
40 confirm the presence of a genotype-phenotype correlation in 5 out of 7 samples and to prove that  
41 they were triple mutants. Fluorescence, exposure = 2 seconds. Scale bar 200  $\mu$ m.

42 F-I. Representative pictures of WISH performed on *gr*<sup>+/-</sup>; *vhl*<sup>+/-</sup> incross derived larvae, at 5 dpf,  
43 using *pomca* as probe. Of note, *gr*<sup>-/-</sup>; *vhl*<sup>-/-</sup> showed upregulated *pomca* expression (20/20 larvae),  
44 as observed in *gr*<sup>-/-</sup> (20/20 larvae); *vhl* mutants showed downregulated *pomca* expression  
45 (20/20 larvae), whereas wildtypes showed normal *pomca* expression (19/20). Chi-square test  
46 (\*\*\*\*P < 0.0001). Scale bar 50  $\mu$ m.

47  
48

1 **Fig 5. BME treatment is able to upregulate HIF signalling in *vhl*<sup>-/-</sup>.**

2 A-B'. Representative pictures of WISH performed on DMSO (A-B) and BME [30  $\mu$ M] (A'-B')  
3 treated *vhl*<sup>-/-</sup> incross derived larvae, at 5 dpf, using *ldha* as probe. DMSO treated *vhl* siblings  
4 showed basal *ldha* expression (34/35 larvae), which showed to be upregulated after BME  
5 treatment (33/35 larvae). On the other hand, DMSO treated *vhl*<sup>-/-</sup> showed upregulated *ldha*  
6 expression (32/35 larvae), which was further upregulated after BME treatment (34/35 larvae).  
7 (black arrowhead: head and liver) Chi-square test (\*\*\*\*P < 0.0001). Scale bar 200  $\mu$ m.

8 C-D'. Representative pictures of WISH performed on DMSO (C-D) and BME [30  $\mu$ M] (C'-D')  
9 treated *vhl*<sup>-/-</sup> incross derived larvae, at 5 dpf, using *phd3 (egln3)* as probe. As expected, *vhl*  
10 siblings DMSO treated (n= 30/30 larvae) showed basal *phd3* expression, which was mildly  
11 increased after BME treatment (n= 27/30 larvae). *Vhl*<sup>-/-</sup> DMSO treated (n= 28/30 larvae)  
12 showed upregulated *phd3* expression, which was further increased after BME treatment (n=  
13 26/30 larvae). (black arrowhead: head and liver) Chi-square test (\*\*\*\*P < 0.0001). Scale bar 200  
14  $\mu$ m.

15  
16

17 **Fig 6. Both Gr and Mr are directly required in the HIF signalling pathway.**

18 A-F. Representative pictures of 5 dpf CRISPANT mutants created by redundantly targeting *nr3c2*  
19 (*mr*) gene via co-injection of 4x gRNAs in *gr*<sup>+/-</sup>;*vhl*<sup>+/-</sup>(*phd3:eGFP*) x *gr*<sup>-/-</sup>;*vhl*<sup>+/-</sup>(*phd3:eGFP*) derived  
20 embryos (n=344). Uninjected embryos were used as control (n=170). Fluorescence, exposure =  
21 991,4 ms. Scale bar 500  $\mu$ m.

22 G. Statistical analysis performed on mean grey value quantification (at the level of the head,  
23 liver and tail), after phenotypic analysis, on 5 dpf *mr* 4x gRNAs injected and uninjected larvae.  
24 *vhl*<sup>-/-</sup> uninjected n = 17 larvae: head 48.28  $\pm$  2.99 (mean  $\pm$  s.e.m); liver 46.47  $\pm$  3.55 (mean  $\pm$   
25 s.e.m); tail 16.15  $\pm$  1.06 (mean  $\pm$  s.e.m). *gr*<sup>-/-</sup>;*vhl*<sup>-/-</sup> uninjected n = 8 larvae: head 35.48  $\pm$  2.03  
26 (mean  $\pm$  s.e.m); liver 23.56  $\pm$  1.72 (mean  $\pm$  s.e.m); tail 10.98  $\pm$  0.75 (mean  $\pm$  s.e.m). *vhl*<sup>-/-</sup> injected  
27 n = 15 larvae: head 24.62  $\pm$  0.97 (mean  $\pm$  s.e.m); liver 20.67  $\pm$  1.1 (mean  $\pm$  s.e.m); tail 8.57  $\pm$  0.39  
28 (mean  $\pm$  s.e.m). *gr*<sup>-/-</sup>;*vhl*<sup>-/-</sup> injected n = 16 larvae: head 18.33  $\pm$  0.46 (mean  $\pm$  s.e.m); liver 10.71  $\pm$   
29 0.56 (mean  $\pm$  s.e.m); tail 6.07  $\pm$  0.26 (mean  $\pm$  s.e.m); ordinary One-way ANOVA followed by  
30 Sidak's multiple comparison test.

31  
32  
33  
34  
35  
36  
37  
38  
39  
40  
41  
42  
43  
44  
45  
46  
47  
48  
49

1

2

## Supporting information

3

4 **Fig S1. *arnt1*<sup>-/-</sup>; *vhl*<sup>-/-</sup> larvae showed a reduced *phd3:eGFP* brightness and a partially**  
5 **rescued *vhl* phenotype.**

6 A. Statistical analysis performed on mean gray value quantification (at the level of the head,  
7 liver and tail), after phenotypic analysis on 5dpf DMSO and BME [30µM] treated *arnt1*<sup>+/-</sup>;*vhl*<sup>+/-</sup>  
8 (*phd3:eGFP*) x *arnt1*<sup>-/-</sup>; *vhl*<sup>+/-</sup>(*phd3:eGFP*) derived larvae (n=540). *vhl*<sup>-/-</sup> DMSO treated n=17  
9 larvae: head 166.67 ± 9.63 (mean ± s.e.m); liver 138.61 ± 12.05 (mean ± s.e.m); tail 50.31 ± 4.51  
10 (mean ± s.e.m). *arnt1*<sup>-/-</sup>;*vhl*<sup>-/-</sup> DMSO treated n = 13 larvae: head 121.05 ± 6.99 (mean ± s.e.m);  
11 liver 49.61 ± 3.88 (mean ± s.e.m); tail 21.75 ± 1.12 (mean ± s.e.m). *vhl*<sup>-/-</sup> BME treated n = 18  
12 larvae: head 199.88 ± 7.71 (mean ± s.e.m); liver 222.57 ± 8.72 (mean ± s.e.m); tail 57.57 ± 4.11  
13 (mean ± s.e.m). *arnt1*<sup>-/-</sup>;*vhl*<sup>-/-</sup> BME treated n = 12 larvae: head 153.71 ± 8.66 (mean ± s.e.m); liver  
14 62.58 ± 5.16 (mean ± s.e.m); tail 25.82 ± 1.54 (mean ± s.e.m). Ordinary One-way ANOVA  
15 followed by Sidak's multiple comparison test (\*P < 0.05; \*\*P < 0.01; \*\*\*P < 0.001; \*\*\*\*P <  
16 0.0001).

17 B. Kaplan-Meier survival curves of the zebrafish *arnt1*<sup>+/-</sup>; *vhl*<sup>+/-</sup>(*phd3:eGFP*) genotype analysed in  
18 this study. Time is shown in days. Siblings n = 30; *arnt1*<sup>-/-</sup>; *vhl*<sup>-/-</sup>(*phd3:eGFP*) n = 8. The Log-rank  
19 (Mantel-Cox) test was used for statistical analysis. *arnt1*<sup>-/-</sup>; *vhl*<sup>-/-</sup>(*phd3:eGFP*) vs. siblings: \*\*P <  
20 0.0027.

21 C. RTqPCR analysis performed on *arnt1* siblings (n=10; 3 repeats) and *arnt1*<sup>-/-</sup> (n=10; 3 repeats)  
22 larvae at 5 dpf, using *egln3* as probe. Statistical analysis was performed on  $\Delta\Delta$ Ct values, whereas  
23 data are shown as fold change values. Ordinary Two-way ANOVA followed by Dunnett's  
24 multiple comparison test (\*\*\*P < 0.001; \*\*\*\*P < 0.0001).

25 D. Representative picture of head, liver and tail areas selected in each larva to quantify the  
26 *phd3:eGFP*-related brightness via mean grey value quantification (Fiji, ImageJ software).  
27

28

29 **Fig S2. GC target genes expression in the presence of high, moderately upregulated and**  
30 **suppressed HIF signalling pathway.**

31 Schematic view of RTqPCR analysis on *il6st*, *pck1* and *lipca* (GC target genes) expression  
32 performed on the following mutant lines: *vhl*<sup>+/-</sup>(*phd3:eGFP*), *arnt1*<sup>+/-</sup>;*vhl*<sup>+/-</sup>(*phd3:eGFP*) and  
33 *arnt1*<sup>+/-</sup>(*phd3:eGFP*). Statistical analysis performed on  $\Delta\Delta$ Ct values; data are shown as fold  
34 change values for RTqPCR analysed samples; ordinary Two-way ANOVA followed by Dunnett's  
35 multiple comparison test (\*P < 0.05; \*\*P < 0.01; \*\*\*P < 0.001; \*\*\*\*P < 0.0001).

36

37 **Fig S3. *gr*<sup>-/-</sup>; *vhl*<sup>-/-</sup> larvae showed a reduced *phd3:eGFP* brightness and a partially rescued**  
38 **Vhl phenotype.**

39 A-D'. Representative pictures of WISH performed on DMSO and BME [30 µM] treated *arnt1*  
40 mutant line, at 5 dpf, using *cyp17a2* as probe. A-A') *arnt1* wt DMSO treated larvae (n= 26/28)  
41 showed normal *cyp17a2* expression, whereas 2/28 larvae showed a weaker one; B-B') *arnt1* wt  
42 BME treated larvae (n= 28/30) showed downregulated *cyp17a2* expression, whereas 2/30  
43 larvae showed a normal one. C-C') In contrast, *arnt1*<sup>-/-</sup> DMSO treated larvae (n= 24/28) showed  
44 upregulated *cyp17a2* expression, whereas 4/28 larvae showed a weaker one. D-D') *arnt1*<sup>-/-</sup> BME  
45 treated larvae (n= 25/29) showed downregulated *cyp17a2* expression, whereas 4/29, showed a  
46 normal one. Chi-square test (\*\*\*\*P < 0.0001). Scale bar 200 µm.

1  
2 E-H'. Representative pictures of WISH performed on DMSO and BME [30  $\mu$ M] treated *vhl* mutant  
3 line, at 5 dpf, using *cyp17a2* as probe. E-E') DMSO treated *vhl* siblings (n= 18/21) showed  
4 normal *cyp17a2* expression, whereas 3/21 larvae showed a weaker one; F-F') BME treated *vhl*  
5 siblings (n= 28/30) showed downregulated *cyp17a2* expression, whereas 2/30 larvae showed a  
6 normal one. G-G') On the other hand, *vhl*<sup>-/-</sup> DMSO treated larvae (n= 27/28) showed weak  
7 *cyp17a2* expression, whereas 1/28 larvae showed a normal one. H-H') *vhl*<sup>-/-</sup> BME treated larvae  
8 (n= 30/30) showed downregulated *cyp17a2* expression. Chi-square test (\*\*\*\*P < 0.0001). Scale  
9 bar 200  $\mu$ m.

10  
11 I-I'. Representative picture of the colour threshold area calculation method (ImageJ software's  
12 tool) used to quantify the area occupied by the *cyp17a2* WISH staining both in *arnt1* siblings  
13 (n=9) and *arnt1*<sup>-/-</sup> (n=9). I'. unpaired t-test (\*\*\*\*P < 0.0001).

14

15 **Fig S4. *gr*<sup>-/-</sup>; *vhl*<sup>-/-</sup> larvae showed a reduced *phd3:eGFP* brightness and a partially rescued**  
16 ***vhl* phenotype.**

17 A. Statistical analysis performed on mean gray value quantification (at the level of the head,  
18 liver and tail), after phenotypic analysis on 5dpf DMSO and BME [30 $\mu$ M] treated *gr*<sup>+/-</sup>;*vhl*<sup>+/-</sup>  
19 (*phd3:eGFP*) x *gr*<sup>-/-</sup>; *vhl*<sup>+/-</sup>(*phd3:eGFP*) derived larvae (n=600). *vhl*<sup>-/-</sup> DMSO treated n = 9 larvae:  
20 head 186  $\pm$  15.12 (mean  $\pm$  s.e.m); liver 177.01  $\pm$  20.85 (mean  $\pm$  s.e.m); tail 62.34  $\pm$  7.27 (mean  $\pm$   
21 s.e.m). *gr*<sup>-/-</sup>;*vhl*<sup>-/-</sup> DMSO treated n = 7 larvae: head 106.96  $\pm$  3.21 (mean  $\pm$  s.e.m); liver 60.75  $\pm$   
22 2.56 (mean  $\pm$  s.e.m); tail 30.67  $\pm$  1.27 (mean  $\pm$  s.e.m). *vhl*<sup>-/-</sup> BME treated n = 14 larvae: head  
23 224.32  $\pm$  6.83 (mean  $\pm$  s.e.m); liver 244.07  $\pm$  5.31 (mean  $\pm$  s.e.m); tail 80.51  $\pm$  5.49 (mean  $\pm$   
24 s.e.m). *gr*<sup>-/-</sup>;*vhl*<sup>-/-</sup> BME treated n = 9 larvae: head 125.85  $\pm$  3.6 (mean  $\pm$  s.e.m); liver 63.56  $\pm$  2.91  
25 (mean  $\pm$  s.e.m); tail 33.67  $\pm$  1.02 (mean  $\pm$  s.e.m). Ordinary One-way ANOVA followed by Sidak's  
26 multiple comparison test (\*P < 0.05; \*\*P < 0.01; \*\*\*P < 0.001; \*\*\*\*P < 0.0001).

27 B. Kaplan-Meier survival curves of the zebrafish *gr*<sup>+/-</sup>; *vhl*<sup>+/-</sup>(*phd3:eGFP*) genotype analysed in  
28 this study. Time is shown in days. Wild-types n = 20; *gr*<sup>+/-</sup>; *vhl*<sup>+/-</sup> n = 20; *gr*<sup>-/-</sup>; *vhl*<sup>+/-</sup>(*phd3:eGFP*) n  
29 = 5. The Log-rank (Mantel-Cox) test was used for statistical analysis. *gr*<sup>-/-</sup>; *vhl*<sup>+/-</sup>(*phd3:eGFP*) vs.  
30 *gr*<sup>+/-</sup>; *vhl*<sup>+/-</sup>, \*\*\*\*P < 0.0001; *gr*<sup>-/-</sup>; *vhl*<sup>+/-</sup>(*phd3:eGFP*) vs. *wt*, \*\*\*\*P < 0.0001.

31

32 **Fig S5. *gr*<sup>-/-</sup>; *arnt1*<sup>+/-</sup>; *vhl*<sup>-/-</sup> showed an even more reduced *phd3:eGFP* brightness.**

33 Statistical analysis performed on mean gray values quantification (at the level of the head, liver  
34 and tail), after phenotypic analysis on 5dpf *gr*<sup>+/-</sup>;*arnt1*<sup>+/-</sup>;*vhl*<sup>+/-</sup>(*phd3:eGFP*) incross-derived GFP+  
35 larvae (n=488). *vhl*<sup>-/-</sup> n = 5 larvae: head 125.82  $\pm$  13.05 (mean  $\pm$  s.e.m); liver 98.52  $\pm$  3.8 (mean  
36  $\pm$  s.e.m); tail 37.43  $\pm$  2.45 (mean  $\pm$  s.e.m). *gr*<sup>-/-</sup>;*arnt1*<sup>-/-</sup>;*vhl*<sup>-/-</sup> n = 5 larvae: head 40.24  $\pm$  2.46  
37 (mean  $\pm$  s.e.m); liver 26.07  $\pm$  1.31 (mean  $\pm$  s.e.m); tail 11.22  $\pm$  0.47 (mean  $\pm$  s.e.m); unpaired t-  
38 test (\*\*\*P = 0.0002; \*\*\*\*P < 0.0001).

39

40 **Fig S6. CRISPR/Cas9 injection per se does not affect HIF signalling.**

41 A-D. Representative pictures of 5 dpf CRISPANT mutants created by redundantly targeting  
42 *lamb1b* gene via co-injection of 4x gRNAs in *vhl*<sup>+/-</sup>(*phd3:eGFP*) incross-derived embryos  
43 (n=400). Uninjected embryos were used as control (n=470). Fluorescence, exposure = 991,4 ms.  
44 Scale bar 500  $\mu$ m.

45 E. Statistical analysis performed on mean grey values quantification (at the level of the head,  
46 liver and tail), after phenotypic analysis on 5 dpf *lamb1b* 4x gRNAs injected and uninjected *vhl*<sup>+/-</sup>  
47 (*phd3:eGFP*) incross-derived larvae. *vhl*<sup>-/-</sup> uninjected n = 24 larvae: head 54.83  $\pm$  3.68 (mean  $\pm$   
48 s.e.m); liver 77.86  $\pm$  6.46 (mean  $\pm$  s.e.m); tail 19.56  $\pm$  1.43 (mean  $\pm$  s.e.m). *vhl*<sup>-/-</sup> injected n = 25

- 1 larvae: head  $59.74 \pm 4.05$  (mean  $\pm$  s.e.m); liver  $83.23 \pm 5.92$  (mean  $\pm$  s.e.m); tail  $19.9 \pm 1.38$
- 2 (mean  $\pm$  s.e.m); unpaired t-test (all panels: \*P < 0.05; \*\*P < 0.01; \*\*\*P < 0.001; \*\*\*\*P < 0.0001).

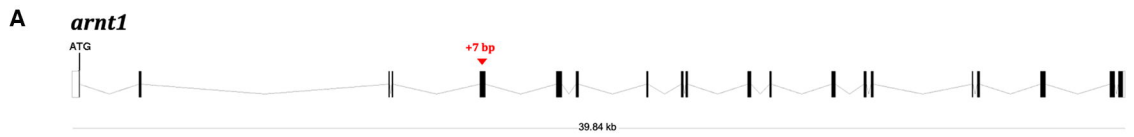

**ARNT1 WILDTYPE:** CTCTAAGAGGAACTGGAAACACCAGCACCGATGGCACCTATAAAC

**ARNT1 7bp ins:** CTCTAAGAGGAACTGGAAACACCAGCACCTAAAAAAGATGGCACCTATAAAC

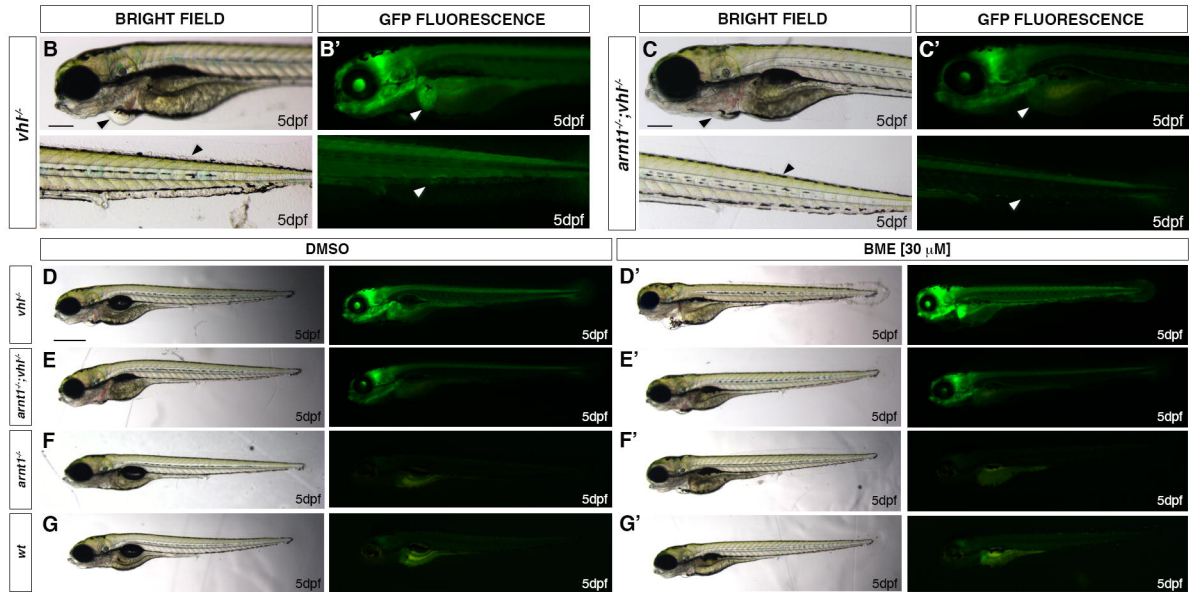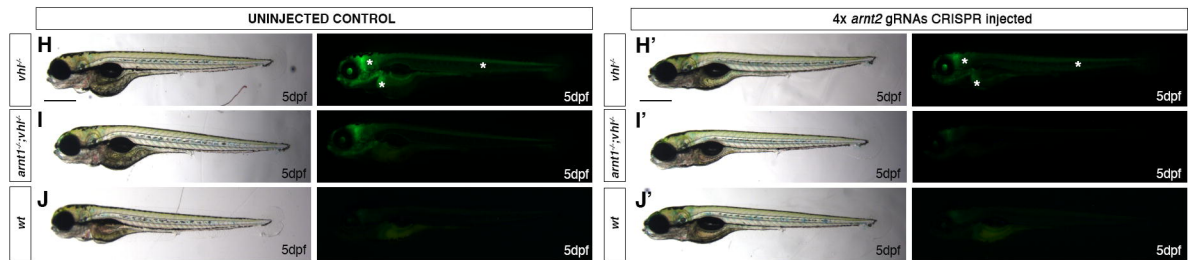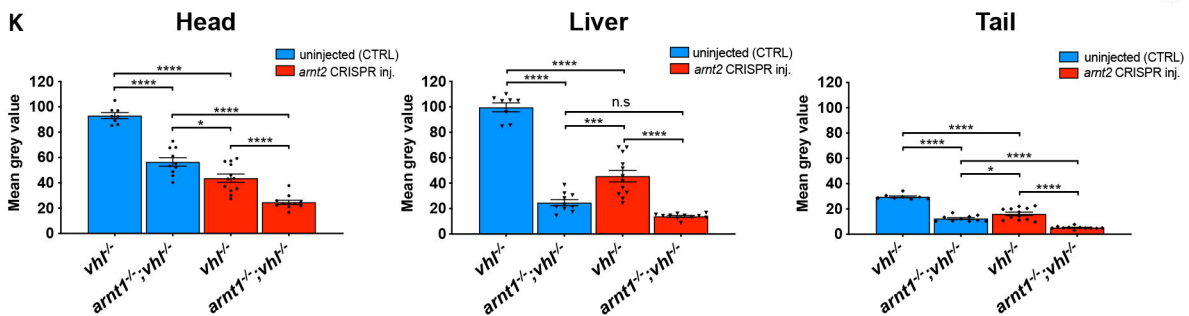



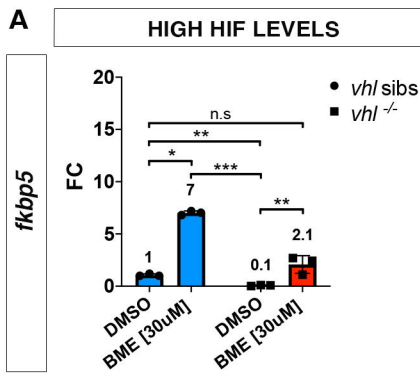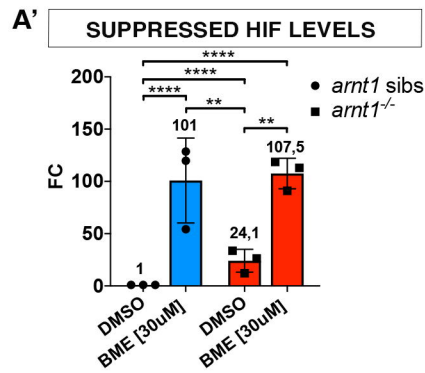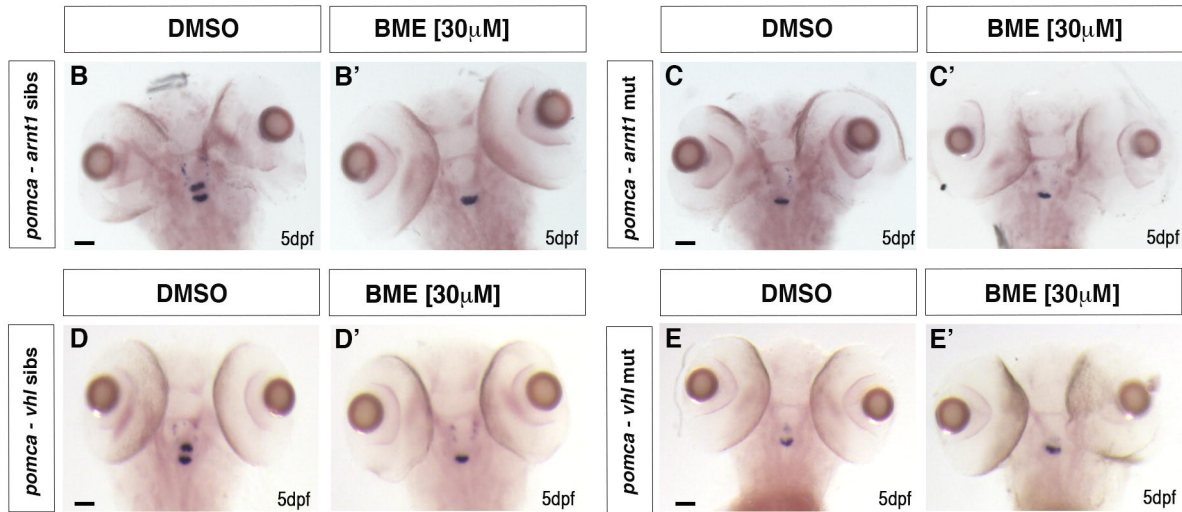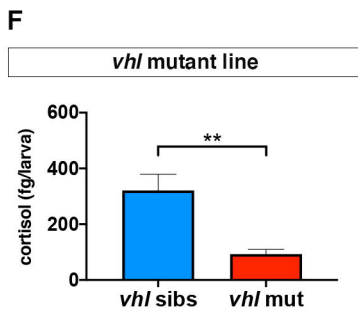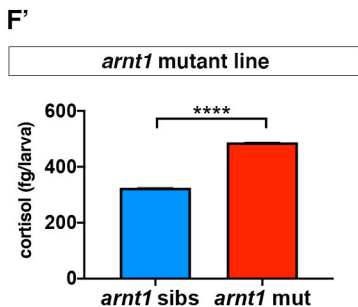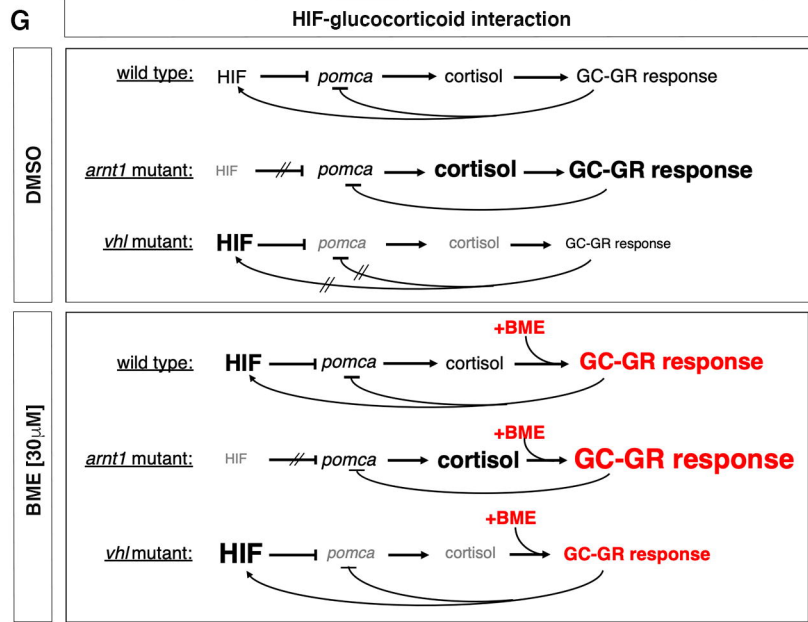

**A** *nr3c1*

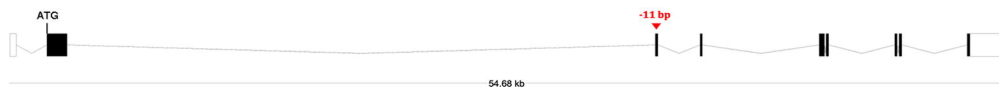

**GR WILDTYPE:** GCCTGAAGACAGCACTGCCACATCGTCTGAGCTGGTGGAAAGACTGGACA

**GR  $\Delta$ 11bp:** GCCTGAAGACAGCACTGCCACATCGTCTGAG-----ACTGGACACA

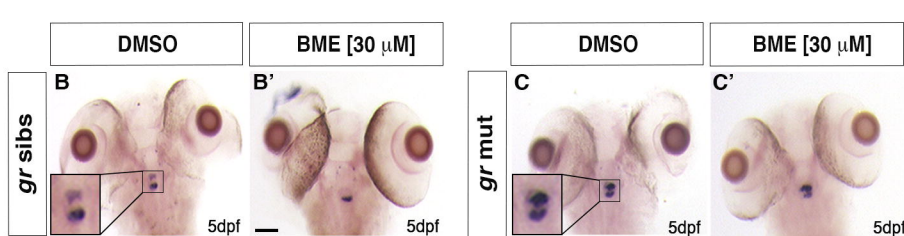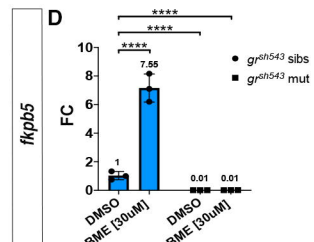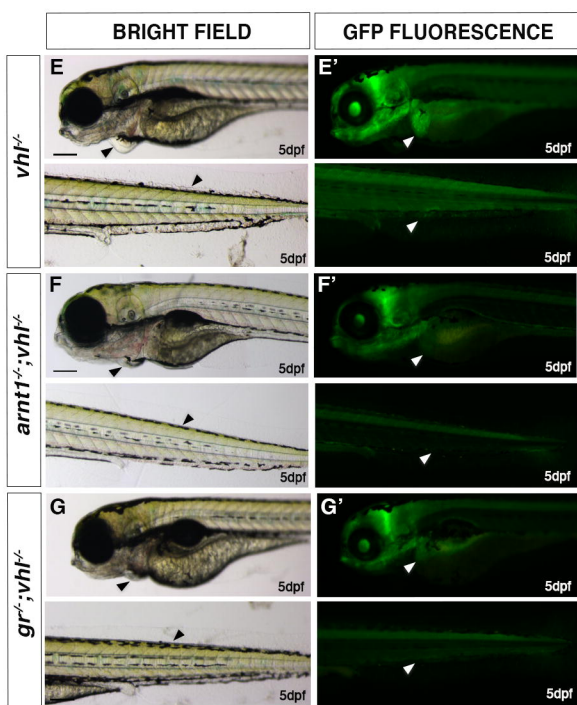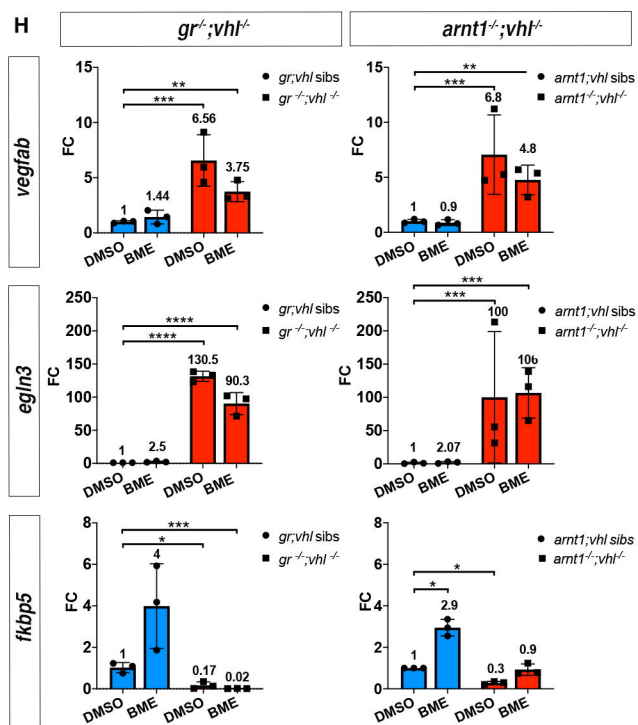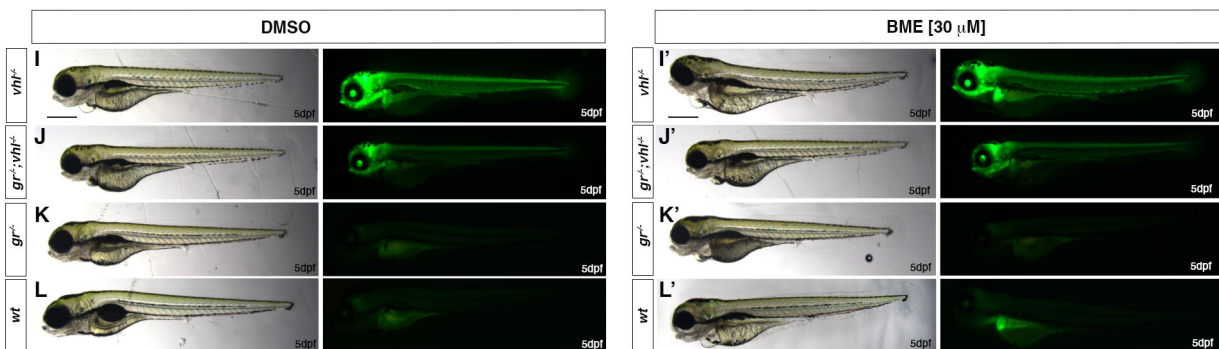

BRIGHT FIELD

GFP FLUORESCENCE

BRIGHT FIELD

GFP FLUORESCENCE

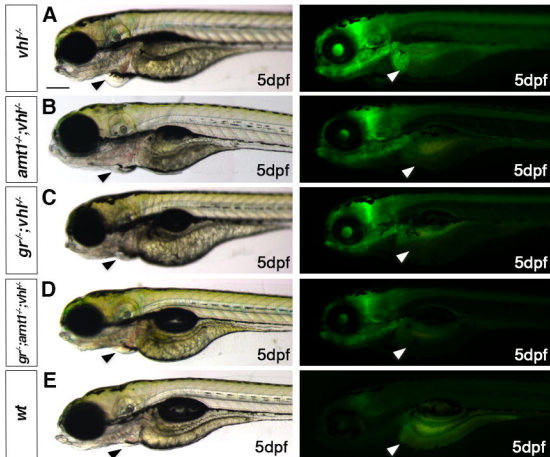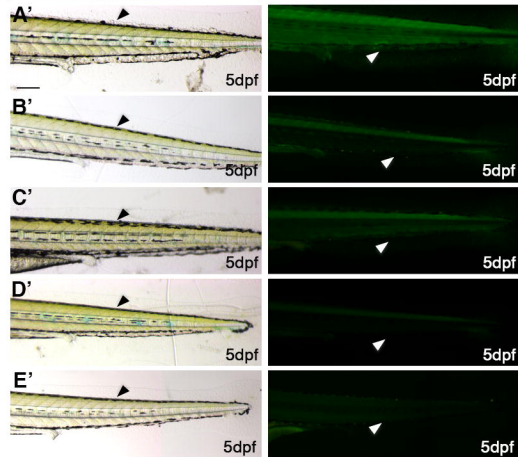

wt

*vhl*<sup>-/-</sup>*gr*<sup>-/-</sup>*gr*<sup>-/-</sup>;*vhl*<sup>-/-</sup>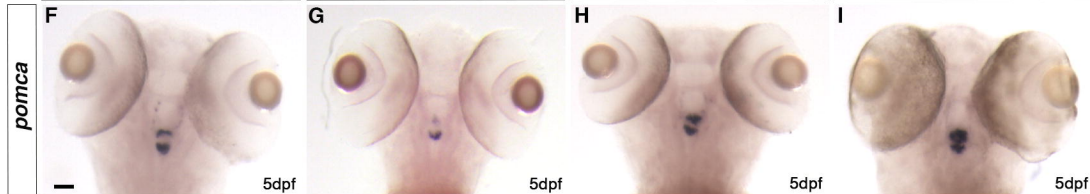

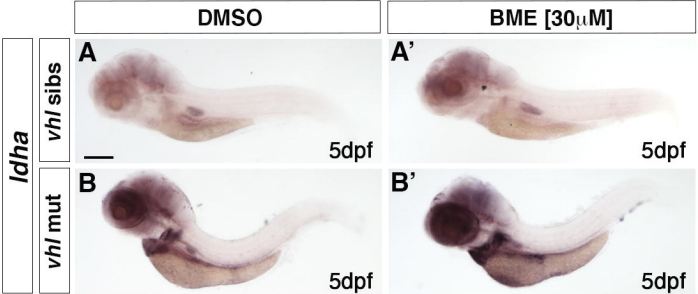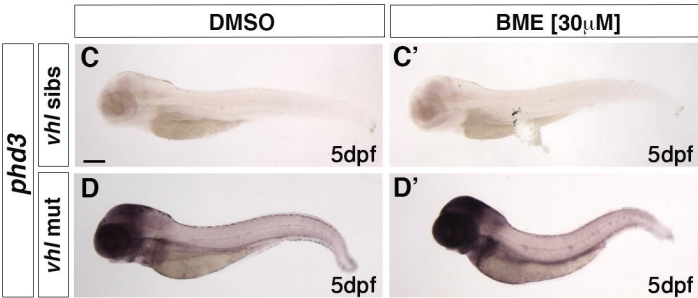

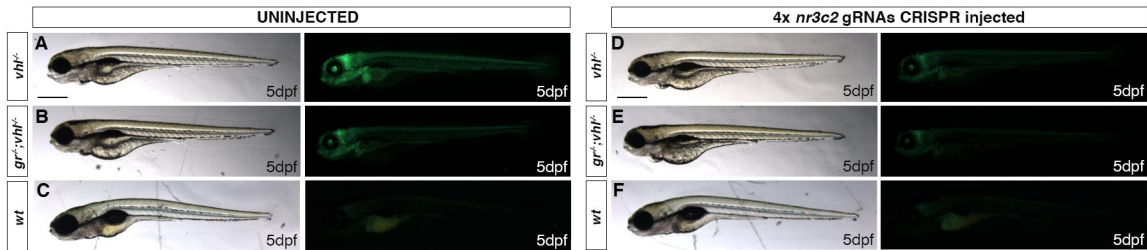

**G**

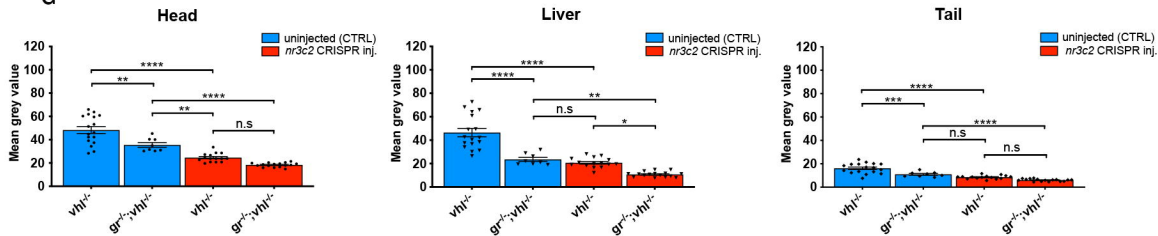

Source: https://www.biorxiv.org/content/10.1101/748566v3.full.pdf
